1 **Ecological and social pressures interfere with homeostatic sleep regulation in the wild**

2  
3 Loftus JC<sup>abcd</sup>, Harel R<sup>b</sup>, Nuñez CL<sup>bd</sup> & Crofoot MC<sup>abcd</sup>

4  
5  
6  
7 a Department of Anthropology, University of California at Davis, Davis, CA 95616

8 b Department for the Ecology of Animal Societies, Max Planck Institute of Animal Behavior,  
9 Konstanz, Germany 78467

10 c Department of Biology, University of Konstanz, Konstanz, Germany 78464

11 d Centre for the Advanced Study of Collective Behaviour, University of Konstanz, Konstanz,  
12 Germany 78464

13  
14  
15  
16 Corresponding author:

17 Carter Loftus

18 1 Shields Avenue

19 Davis, CA 95616

20 +49.159.068.45928

21 jcloftus@ucdavis.edu

22  
23  
24  
25  
26  
27  
28  
29 Keywords: sleep, homeostasis, olive baboon, predation risk, social behavior, biotelemetry

## 56 **Abstract**

57 Sleep is fundamental to the health and fitness of all animals. The physiological importance of  
58 sleep is underscored by the central role of homeostasis in determining sleep investment – following  
59 periods of sleep deprivation, individuals experience longer and more intense sleep bouts. Yet, most  
60 studies of sleep have been conducted in highly controlled settings, disconnected from the ecological  
61 and social context that may exert pressures on sleep patterns in conflict with homeostatic regulation.  
62 Using tri-axial accelerometry and GPS to track the sleep patterns of a group of wild baboons (*Papio*  
63 *anubis*) at multiple temporal and spatial scales, we found that ecological and social pressures indeed  
64 interfere with homeostatic sleep regulation. Baboons sacrificed time spent sleeping when in less  
65 familiar locations and when sleeping in proximity to more group-mates, regardless of how much they  
66 had slept the prior night or how much they had physically exerted themselves the preceding day.  
67 Moreover, we found that the collective dynamics characteristic of social animal groups persist into the  
68 sleep period, as baboons exhibited synchronized patterns of waking throughout the night, particularly  
69 with nearby group-mates. Thus, for animals whose fitness depends critically on avoiding predation  
70 and developing social relationships, maintaining sleep homeostasis may be only secondary to  
71 remaining vigilant when sleeping in risky habitats and interacting with group-mates during the night.  
72 Our results highlight the importance of studying sleep in ecologically relevant contexts, where the  
73 adaptive function of sleep patterns directly reflect the complex trade-offs that have guided its  
74 evolution.

## 75 **Introduction**

76 Sleep is an important and understudied facet of animal lives, with every species, from honey  
77 bees to humans, allocating a portion of every day to this period of rest (Cirelli & Tononi, 2008). The  
78 universality of sleep reflects its central role in important physiological processes, including memory  
79 consolidation, support of the central nervous system, energy conservation and physical restoration  
80 (Chowdhury & Shafer, 2020; Gangwisch, 2014; Stickgold, 2005; Vyazovskiy, 2015). Accordingly,  
81 failure to meet daily sleep demand has health consequences (Basner et al., 2013), with potentially  
82 fatal repercussions of extreme sleep deprivation (Rechtschaffen & Bergmann, 2002). The  
83 physiological need for sleep is emphasized by its homeostatic control – after periods of insufficient  
84 sleep or extreme physical exertion, individuals experience particularly long and intense bouts of sleep  
85 (Kitamura et al., 2016). Decades of sleep research have consistently implicated homeostasis as a  
86 primary determinant of sleep patterns, such that homeostatic regulation has become an important  
87 criterion in the very definition of sleep (Siegel, 2008).

88 A strong focus on studying sleep in the laboratory or at the bedside, although revealing much  
89 about the physiology of sleep, has inherently overlooked the ecological pressures that drive the  
90 regulation and evolution of sleep (Rattenborg et al., 2017; Reinhardt, 2020). In the natural world, the  
91 significance of sleep extends beyond its direct physiological impacts. Sleeping animals typically  
92 cannot engage in other behaviors that are important to their survival (but see Rattenborg et al., 2016),

93 and investing in sleep when environmental forces render vigilance and activity particularly important  
94 may impose substantial costs to wild animals. In addition to preventing animals from foraging,  
95 searching for mating opportunities, defending territories, and caring for young, sleep leaves animals in  
96 a state of extreme inattention, and thus highly vulnerable to their predators (Lima et al., 2005). The  
97 evolution of sleep and its manifestation in the wild may therefore be driven by a complex balance  
98 between the physiological need for sleep and ecological costs imposed on sleeping animals.

99 For gregarious animals, the balance between the costs and benefits of sleep may be further  
100 modulated by the social environment. However, even the most basic aspects of sleeping with  
101 conspecifics, such as whether the social context facilitates or constrains sleep, remain unknown  
102 (Karamihalev et al., 2019). Sleeping in a social context could alter the costs of sleep – the sentinel  
103 hypothesis suggests that staggering the timing of sleep bouts in a group can collectively maintain both  
104 high quality sleep and high levels of anti-predator vigilance (Samson et al., 2017; Snyder, 1966).  
105 Sleeping in a group may therefore facilitate an individual’s ability to fulfill its physiological  
106 requirements for sleep by reducing the risk of doing so. Alternatively, social dynamics may actually  
107 inhibit investment in sleep. Sleep may present social opportunity costs, causing individuals to  
108 sacrifice sleep in order to spend more time actively engaging with group-mates. Additionally,  
109 proximity to group-mates may cause cascading disruptions initiated by short periods of wakeful  
110 activity of neighboring individuals. Thus, sleeping in close proximity to conspecifics may potentially  
111 be accompanied by both costs and benefits for an individual’s ability to obtain sufficient sleep, and  
112 discovering how these potential costs and benefits are actually realized will shed light on the forces  
113 that have guided sleep adaptations in social animals.

114 To understand how group-living animals navigate tradeoffs between their physiological need  
115 for sleep and the ecological and social pressures that shape the costs and benefits associated with this  
116 biological imperative, we investigated the factors shaping sleep patterns of wild olive baboons (*Papio*  
117 *anubis*). Baboons live in stable multi-male, multi-female groups of up to 100 individuals (Cheney &  
118 Seyfarth, 2008), and during the night, they seek safety in trees and rock outcroppings (Altmann &  
119 Altmann, 1970; Busse, 1980). Despite seeking refuge in these sleep sites, baboons remain particularly  
120 vulnerable to nighttime predation from leopards, which represents the single largest source of  
121 mortality for adult baboons (Cheney et al., 2004; Cowlshaw, 1994; Isbell et al., 2018). Baboons must  
122 therefore navigate the tradeoff between investing in sleep and maintaining anti-predator vigilance. As  
123 a highly gregarious animal whose fitness depends heavily on their social relationships (Silk et al.,  
124 2009), baboons must also balance their time spent sleeping with their investment in social  
125 interactions, as time constraints during the day limit their ability to build and maintain their  
126 relationships (Dunbar, 1992).

127 We simultaneously tracked the activity of 26 wild olive baboons from the same group using  
128 collars fitted with GPS sensors and tri-axial accelerometers to understand how baboons manage their  
129 competing nighttime priorities. Accelerometer-based sleep classification has shown an impressive

130 ability to detect and monitor sleep behavior across taxa (Ancoli-Israel et al., 2003; de Souza et al.,  
131 2003; Hoffmann et al., 2012; Ladha & Hoffman, 2018; Malungo et al., 2021; Qin et al., 2020), and is  
132 now commonly used to assess sleep in both humans (e.g. Jones et al., 2019; Patel et al., 2017) and  
133 non-human animals (e.g. Gravett et al., 2017; Reinhardt, 2020; Samson et al., 2018). Validation  
134 studies comparing performance of this non-invasive method to polysomnography—the gold standard  
135 in sleep research—generally show high accuracy (78-90%; Ancoli-Israel et al., 2003; Kanady et al.,  
136 2011; Malungo et al., 2021; Shambroom et al., 2012), although concerns remain about the ability of  
137 movement-based methods to distinguish sleep from resting wakefulness (Ancoli-Israel et al., 2003; de  
138 Souza et al., 2003), and results must be evaluated with these caveats in mind. For this study, we  
139 adapted a well-validated sleep classification algorithm used in human research (van Hees et al., 2015;  
140 van Hees et al., 2018) and validated its ability to detect sleep in wild baboons. We then used this  
141 algorithm to describe the sleep patterns of members of our study group over a period of a month  
142 (Table S1). We used these data to assess the influence of homeostatic regulation on the pattern of  
143 sleep and wake bouts within nights, as well as the duration of sleep across nights. We compared this  
144 influence to that of the location in which individuals slept (both within the sleep site as well as  
145 between distinct sleep sites) and their local social environment, both of which may exert pressures on  
146 sleep behavior in the wild that conflict with the maintenance of homeostasis.

## 147 **Results**

148 The diel pattern of activity in wild baboons, as reflected by accelerometry data, reveals a clear  
149 monophasic sleep pattern, with individuals active during the day and inactive at night (Fig. 1B). To  
150 derive metrics of sleep (sleep onset time, awakening time, total sleep time, sleep period duration,  
151 sleep efficiency), we calculated the log of the vectorial dynamic body acceleration (VeDBA), a  
152 widely-used measure of overall movement activity (Qasem et al., 2012), from 36 calendar days or 354  
153 baboon-nights. Sleep onset occurred  $53.0 \pm 1.7$  (mean  $\pm$  SE) minutes prior to the end of evening  
154 astronomical twilight, and baboons awoke  $35.9 \pm 1.7$  minutes after the beginning of morning  
155 astronomical twilight (Fig. 1A,C). The duration of the sleep period – the period between sleep onset  
156 and awakening – was  $11.0 \pm 0.04$  hours on average. Within the sleep period, baboons slept for an  
157 average of  $9.2 \pm 0.04$  hours (total sleep time), displaying an average sleep efficiency of  $85.0\% \pm$   
158  $0.2\%$ .

159 [Figure 1]

160 Due to high correlation of total sleep time with onset time, awakening time, sleep period  
161 duration, and sleep efficiency (Table S2), we focused the majority of our analyses on total sleep time.  
162 Individuals differed in their total sleep time, and much of this variation reflected differences between  
163 the sexes and variation across age categories. Males slept an average of 20 minutes longer than  
164 females (Linear Mixed Model (LMM): standardized estimate [95% credible interval lower bound,  
165 95% credible interval upper bound]: 0.44 [-0.04, 0.92]), while juveniles and subadults slept, on

166 average, 15 minutes less than adults (LMM: juveniles: -0.32 [-1.12, 0.50]; subadults: -0.32 [-0.80,  
167 0.14]).

168 The maintenance of homeostasis was not a strong driver of sleep patterns (Fig. 2). After  
169 sleeping poorly (low total sleep time), baboons did not ‘catch up’ by napping more on the following  
170 day (Table S6; LMM: 0.05 [-0.08, 0.18]) or sleeping longer the following night (Fig. 2A; LMM: 0.00  
171 [-0.14, 0.13]). However, baboons did sleep less following days on which they spent more time  
172 napping (Fig. 2B; LMM: -0.18 [-0.36, -0.01]). For every minute spent napping, baboons spent 0.6  
173 fewer minutes sleeping the following night. Baboons’ sleep duration was uninfluenced by their  
174 physical exertion during the day, as measured by either the distance they traveled (Fig. 2C; LMM: -  
175 0.02 [-0.18, 0.15]), or their cumulative daytime VeDBA (Table S5; LMM: -0.12 [-0.33, 0.12]). In  
176 humans, homeostatic regulation of sleep manifests within, as well as between nights: sleep wanes and  
177 wakeful activity increases over the course of the sleep period as individuals gradually fulfill their  
178 sleep requirements (Winnebeck et al, 2018). Baboons, in contrast, did not experience this increase in  
179 wakefulness as the night progressed, despite exhibiting cyclic sleep patterns that are otherwise similar  
180 to patterns of human sleep (Fig. 2D; GAMM:  $r^2_{\text{adj}} = 0.008$ ,  $F_{(8,741)} = 89.16$ ,  $p < 1 \times 10^{-15}$ ).

181 [Figure 2]

182 The location where baboons slept had a strong influence on sleep duration, with individuals  
183 sleeping less when spending the night in less familiar locations. For the first 21 nights of the study,  
184 group members slept at the same site, distributed across ten adjacent yellow fever (*Acacia*  
185 *xanthophloea*) trees (Fig. 3A). Individuals showed high fidelity to particular sleep trees (Fig. S3; one-  
186 tailed two-sample Kolmogorov-Smirnov test:  $p < 1.0 \times 10^{-9}$ ), returning each night to one or a small set  
187 of the available trees populated by the group. Not only did the choice of tree itself influence sleep  
188 duration (Table S3 – S4, Fig. S4), but the individual’s familiarity with their selected tree impacted  
189 how much they slept. Baboons slept longer in trees to which they showed higher fidelity (Fig. 3C;  
190 LMM: 0.20 [0.05, 0.36]), with individuals sleeping up to 33.3 minutes longer in the tree to which they  
191 showed highest fidelity than in the tree to which they showed lowest fidelity. Following a failed  
192 leopard attack on the 21<sup>st</sup> night of the study, the group moved to a less commonly used sleep site 1.5  
193 km away (Fig. 3B). They remained at this sleep site for three nights before returning to sleep at their  
194 main sleep site. While the baboons showed no substantial decrease in their sleep duration on the night  
195 of the leopard attack (Fig. 3D, Fig. S7; LMM: -0.25 [-0.87, 0.39]), they slept 72 minutes less, on  
196 average, upon moving to the less familiar sleep site (Fig. 3D, Fig. S7; LMM: -1.55 [-2.18, -0.91]).  
197 This decrease in total sleep time following the change in sites was limited to the first night in the new  
198 sleep site, after which sleep durations returned to normal (Fig. 3D; Fig. S7).

199 [Figure 3]

200 Sleeping in a social context also impacted sleep duration, as group-mates disrupted each  
201 other’s rest during the night. Contrary to predictions of the sentinel hypothesis, the proportion of the  
202 night in which at least one individual was awake was significantly less than expected by chance (Fig.

203 4A; Fisher's exact test:  $p < 0.0001$ ), suggesting that, rather than staggering periods of nocturnal  
204 wakefulness, group-mates were actually synchronized in their sleep-wake patterns throughout the  
205 night. Confirming this synchronization, we found that a significantly greater proportion of the group  
206 exhibited the same simultaneous behavior, either being asleep or awake, than expected (Fig. 4B;  
207 Fisher's exact test:  $p < 0.0001$ ). Group members showed a unique pattern of synchronized sleep and  
208 wake bouts each night, and thus, synchronization was not a spurious result of a stereotyped schedule  
209 of activity that happened to be consistent across baboons and across nights (Fig. S10; Fisher's exact  
210 test:  $p < 0.0001$ ). Moreover, pairs of baboons showed more synchronization when sleeping in the  
211 same tree than when sleeping in different trees (Fig. 4C; LMM: 0.56 [0.47 – 0.64]), which suggested  
212 that sleeping individuals may awaken in response to the activity of group-mates in their local  
213 environment, or that external disruptions in the local environment may simultaneously waken all  
214 group members in the vicinity. To distinguish between these potential explanations, we tested the  
215 influence of the number of group-mates in an individual's local environment on their total sleep time,  
216 and found that individuals slept less when sharing their sleeping tree with more group-mates (Fig. 4D;  
217 LMM: -0.51 [-0.85, -0.16]). Each additional tracked group-mate in a tree resulted in a 4.0-minute  
218 decrease in total sleep time. Taken together, these results indicate that synchronization resulted from  
219 social disruptions of sleep.

220 [Figure 4]

221 We found no influence of moon phase or the minimum ambient temperature during the night  
222 on baboon sleep duration (LMM: Moon phase: 0.05 [-0.12, 0.22]; Temperature: -0.03 [-0.21, 0.13]).

## 223 Discussion

224 In this study, we demonstrate that the ecological and social demands that animals experience  
225 in the natural world disrupt the widely-reported homeostatic regulation of sleep. We show that while  
226 baboons sleep less in unfamiliar environments and their sleep is disrupted by the activity of group-  
227 mates, their recent history of sleep and physical exertion has only a limited role in influencing sleep  
228 behavior. Because baboons are highly vulnerable to nocturnal predation (Busse, 1980; Cheney et al.,  
229 2004; Isbell et al., 2018) and because they experience fitness benefits from maintaining strong social  
230 bonds (Silk et al., 2009), sacrificing sleep to maintain alertness in novel environments and to remain  
231 close to group-mates may represent critical adaptations. Our results highlight the tradeoffs that group-  
232 living animals navigate when investing in sleep in the wild, and in doing so, challenge the centrality  
233 of the role that homeostasis has played in shaping sleep patterns in the environment in which sleep  
234 evolved. Decades of research in the laboratory and at the bedside have implicated homeostatic  
235 regulation as a key driver of sleep patterns, with the sleep rebound that follows periods of deficit  
236 facilitating the maintenance of a physiologically required amount of sleep (Amlaner et al., 2009).  
237 However, sleep studies have traditionally investigated sleep in highly controlled environments, where  
238 the costs of investing in sleep are largely absent. Our findings suggest that, in the natural world,

239 “sleep need” may be a relatively flexible concept, with variation in sleep investment driven as much  
240 by the opportunity costs of sleep as by its physiological benefits.

241 There are substantial opportunity costs of devoting a significant portion of every day to  
242 sleeping. Sleeping animals are highly vulnerable to predation (Lima et al., 2005), and our results  
243 suggest that individuals sleep less when the risk of predation is particularly high. Baboon group  
244 members showed high fidelity to particular locations within their main sleep site, and individuals  
245 sacrificed sleep both when sleeping in trees to which they did not show high fidelity as well as upon  
246 moving to a new, less familiar sleep site following a leopard attack. Given that predation risk tends to  
247 be greater in unfamiliar locations (Forrester et al., 2015; Gehr et al., 2020; Yoder et al., 2004),  
248 baboons appear to trade sleep for vigilance according to the current risk of predation. Notably,  
249 however, we did not find that baboons decreased their investment in sleep on the night of leopard  
250 attack. This surprising result may reflect leopards’ disinclination, as stealth hunters, to launch  
251 repeated attacks (Hayward et al., 2006; Lin et al., 2020), or indicate that baboons perceive uncertainty  
252 in the level of risk as potentially more dangerous than a confirmed threat.

253 Engaging in sleep precludes investment in a variety of behaviors, in addition to anti-predator  
254 vigilance, that are important to fitness (Aulsebrook et al., 2016; Lesku et al., 2012; Lima et al., 2005;  
255 Roth et al., 2010). Consistent with our results, recent studies in ecologically-relevant contexts have  
256 revealed that animals forego sleep when ecological demands increase the associated opportunity costs.  
257 For example, while engaging in long, non-stop flights, great frigatebirds reduced the amount they  
258 slept by 92.7%, without apparent physiological consequences (Rattenborg et al., 2016). Similarly,  
259 northern fur seals (*Callorhinus ursinus*) experience extended suppression of rapid eye movement  
260 (REM) sleep – also shown in the laboratory to be homeostatically regulated (Dement, 1960;  
261 Shiromani et al., 2000) – when they migrate in the open ocean for several months (Lyamin et al.,  
262 2018). Moreover, the seals do not experience a rebound in their REM sleep following this period of  
263 deficit (Lyamin et al., 2018). Male pectoral sandpipers greatly reduce their time spent sleeping during  
264 their short and intense mating season, and males that slept less actually experienced higher  
265 reproductive success (Lesku et al., 2012). Thus, across contexts and taxa, ecological pressures appear  
266 to supersede the maintenance of sleep homeostasis in the wild.

267 Recent technological advances allowing for the use of polysomnography – the gold standard  
268 for recording sleep – have played an important role in revealing the ecological tradeoffs that wild  
269 animals face when navigating decisions about when, where, and how to sleep (Davimes et al., 2018;  
270 Lesku et al., 2011, 2012; Rattenborg et al., 2008, 2016; Scriba et al., 2013; Voirin et al., 2014).  
271 Although these advances hold great promise for wider application in the future, the invasive nature of  
272 polysomnography unfortunately limits its current use to taxa whose daily activities do not interfere  
273 with electrodes implanted either subdermally or inter-cranially. Because baboons are highly dexterous  
274 and engage in frequent allogrooming, we were unable to apply this gold standard, and instead,  
275 resorted to an alternate method in order to ask and answer important questions about the ecology of

276 sleep in a wild social primate. Accelerometer-based sleep classification – a tool already used to  
277 investigate sleep across terrestrial (human: Jones et al., 2019; Patel et al., 2017; non-human: Bäckman  
278 et al., 2017; Davimes et al., 2018; Gravett et al., 2017; Lesku et al., 2011; Malungo et al., 2021; Qin et  
279 al., 2020; Reinhardt et al., 2019; Reyes et al., 2021; Samson et al., 2018; Sellers & Crompton, 2004;  
280 Sri Kantha & Suzuki, 2006; Suzuki et al., 2018) and marine taxa (Miller et al., 2008; Mitani et al.,  
281 2010; Wright et al., 2017) – offered a valid alternative to polysomnography. We note that the use of  
282 accelerometry can introduce biases in sleep monitoring, typically by overestimating total sleep time as  
283 a result of an inability to distinguish resting wakefulness from sleep (Ancoli-Israel et al., 2003; de  
284 Souza et al., 2003). However, if these biases are considered during the interpretation of results, the use  
285 of accelerometry to investigate sleep provides an immediate opportunity to shed light on how diverse  
286 species balance their physiological sleep requirements with ecological opportunity costs that vary  
287 according to natural history, trophic level, community composition, climate, and local environment.  
288 Further, the relative ease of accelerometer deployment, and its prevalence in ecological research,  
289 changes the scale at which sleep behavior can be studied, enabling the simultaneous and long-term  
290 monitoring of sleep at the population level. This rescaling of sleep research creates many new  
291 opportunities, one of which is the ability to record sleep in the majority of social group members and  
292 thus explore an exciting new scientific frontier: the collective dynamics of sleep.

293         Using accelerometry to track the sleep patterns of nearly an entire group of wild baboons, we  
294 demonstrated the importance of the social environment in shaping the sleep patterns of group-living  
295 animals. Contrary to the predictions of the sentinel hypothesis (Samson et al., 2017; Snyder, 1966),  
296 periods of nocturnal wakefulness of group members were not staggered, but rather synchronized,  
297 particularly with nearby group-mates. Baboons also slept less when in close proximity to a greater  
298 number of group-mates. Taken together, these results suggest that group-mates disrupt each other's  
299 sleep. Social disruptions may result from group-mates actively interacting with each other during the  
300 night. Gregarious animals often invest substantially in building and maintaining social relationships  
301 with their group-mates (Ward & Webster, 2016), and these bonds can prove essential to their fitness  
302 (Cameron et al., 2009; Campos et al., 2020; Frère et al., 2010; Riehl & Strong, 2018; Silk et al.,  
303 2009). Because animals have limited time to devote to maintaining their social bonds during the day  
304 (Dunbar, 1992), they may actively sacrifice sleep in order to invest in these relationships at night.  
305 Alternatively, social animals may wake in response to the periodic waking and repositioning of their  
306 group-mates during the night, and thus, socially-disrupted sleep may be an inherent by-product of  
307 sleeping in a group. Simply remaining in a cohesive group may therefore present a challenge to  
308 obtaining sufficient sleep.

309         Social animals may jeopardize sleep homeostasis to maintain cohesion with their conspecifics  
310 because remaining in close proximity to their group-mates during the sleep period could prove  
311 essential to their fitness. Individuals likely benefit from the dilution of predation risk that is achieved  
312 through group cohesion, particularly when they are sleeping and thus highly vulnerable to predators



313 (Lehtonen & Jaatinen, 2016). Collective vigilance may also reduce the risk of predation for group  
314 members. Even in the absence of collective vigilance optimization via non-randomly staggered  
315 wakefulness, the proportion of the night with at least one group member awake is still likely to be  
316 substantially greater than any particular individual's investment in vigilance. In our study, at least one  
317 individual in the group was awake for  $394 \pm 11$  minutes ( $82\% \pm 2\%$ ) from 21:00 to 05:00, although  
318 each individual was only awake for  $79 \pm 1$  minutes ( $16\% \pm 0.2\%$ ) of the same period. Samson and  
319 colleagues (2017) found high levels of collective vigilance during the night in a group of Hadza  
320 hunter-gatherers, and they suggest that this collective vigilance may facilitate higher intensity sleep  
321 (Samson & Nunn, 2015). Because accelerometry cannot measure sleep intensity, we were unable to  
322 test whether collective vigilance allowed individuals sleeping close to group-mates to experience  
323 more intense, albeit shorter, sleep. Future studies leveraging advances in polysomnography (i.e. EEG)  
324 that may eventually allow its application in wild social animals could enable a test of this possibility.

325 Unexpectedly, we found that adult baboons slept longer than subadults and juveniles, and  
326 males slept longer than females. This contrasts with previous research that found age differences in  
327 sleep patterns linked to physiological demands during the development of the central nervous system  
328 (Amlaner et al., 2009) and sex differences in sleep tied to the influence of sex steroids (Mong &  
329 Cusmano, 2016), with younger individuals sleeping more than older individuals (Knutson, 2014;  
330 Ohayon et al., 2004; Olds et al., 2010; Steinmeyer et al., 2010; Stuber et al., 2015) and females  
331 sleeping more than males in birds and humans (Lendrem, 1983; Mong & Cusmano, 2016; Roehrs et  
332 al., 2006; Steinmeyer et al., 2010; Stuber et al., 2015). Our surprising results here may be an artefact  
333 of the tendency of accelerometer-based sleep monitoring to classify resting wakefulness as sleep  
334 (Table S12; Ancoli-Israel et al., 2003; de Souza et al., 2003). Older individuals may rest quietly when  
335 waking during the night, thus falsely determined to be asleep according to their accelerometry,  
336 whereas younger individuals may be more likely to resume activity upon waking. However, if these  
337 findings are not the result of a bias in our sleep recording technique, they may reflect variation in the  
338 vulnerability to predation among the age-sex classes in this highly sexually dimorphic species  
339 (Cheney et al., 2004), with young and female baboons likely realizing a higher cost of sleep than adult  
340 males. Individuals may also differ in their sleep patterns due to their ability to gain access to a high-  
341 quality sleep location within the group's sleep site. Our results have demonstrated the importance of  
342 location to sleep duration. However, group-mates may differ in their access to preferred sleep  
343 locations, particularly if preferred locations are limited. Baboon groups are structured by linear  
344 dominance hierarchies that shape the priority of access to resources (Cheney & Seyfarth, 2008; King  
345 et al., 2009; Marshall et al., 2015), and individuals can leverage their affiliative and kinship  
346 relationships to obtain resources that they would not be able to access based on social rank alone (Sick  
347 et al., 2014). Further research is needed to investigate the extent to which these complex social  
348 dynamics influence an individual's ability to obtain a preferred sleep location and, thus, a good  
349 night's sleep.

350 In addition to highlighting social dynamics as a key driver of sleep patterns in group-living  
351 species, our study provides important insights into selective pressures that may have shaped the  
352 evolution of human sleep. The physiological requirements for sleep and the homeostatic mechanisms  
353 that ensure this requirement is fulfilled have long been assumed to be the key drivers influencing the  
354 way that our sleep has evolved and the characteristics of our sleep today. However, we suggest that  
355 the criticality of homeostatic control in shaping our sleep patterns could be an artefact of sleeping in  
356 an environment devoid of the ecological and social costs that sleep would have presented our  
357 ancestors. Evidence suggests that, like baboons, early hominins were extremely vulnerable to  
358 nighttime predation in their dry savannah habitats (Brain, 1983; Treves & Palmqvist, 2007;  
359 Wrangham & Carmody, 2010). Hominins likely remained vulnerable to nocturnal predation until they  
360 began to manipulate fire, around which they could sleep to reduce the risk of predation (Samson &  
361 Nunn, 2015), and some characteristics of our sleep today may be best explained in light of the  
362 vulnerability that sleep imparted on our ancestors. For example, modern humans exhibit decreased  
363 sleep quality when sleeping in an unfamiliar environment (Tamaki et al., 2016), similar to the  
364 baboons in our study. The lower quality sleep resulting from this aptly named “first night effect” is  
365 limited to the first night in a new location (Tamaki et al., 2016), and our findings suggest that the first  
366 night effect may be conserved from an environment where this first night would have been  
367 accompanied by poor information about risk and thus, a higher likelihood of predation. Early  
368 hominins would have also experienced a social opportunity cost of sleep, as they likely slept in groups  
369 (Samson & Nunn, 2015; Willems & van Schaik, 2017) and would have experienced constraints on the  
370 time available to maintain their social network during the day, until developing the advanced  
371 cognition that enabled a more efficient use of time (Nunn & Samson, 2018; Samson & Nunn, 2015).  
372 While our sleep has likely evolved substantially from that of our earliest ancestors, with modern  
373 human sleep being extremely short and intense compared to that of other primates (Nunn et al., 2016;  
374 Nunn & Samson, 2018), a full understanding of the way we sleep involves considering not only the  
375 physiological benefits of sleep, but also its ecological and social costs in the environment in which it  
376 evolved.

## 377 **Materials and Methods**

### 378 *Data collection*

379 We monitored sleep and activity patterns in a group of olive baboons at Mpala Research  
380 Centre (MRC), a 200 km<sup>2</sup> conservancy located on the Laikipia Plateau in central Kenya. We trapped  
381 and anesthetized 26 individuals, which comprised more than 80% of the adults and subadults in the  
382 study group (see Strandburg-Peshkin et al., 2015 for details on capture methodology). Upon capture,  
383 we noted the age class and sex of each baboon, as well as whether the baboon was lactating. We fit  
384 each individual with a GPS and accelerometry collar that recorded the baboon’s GPS location at 1 Hz  
385 sampling interval and continuous tri-axial accelerations at 12 Hz/axis from 06:00 to 18:00. From 18:00  
386 to 06:00, the collars recorded a 2.5-second burst of accelerations at 10 Hz/axis at the beginning of

387 every minute. The collars were programmed to collect data from August 1, 2012 to September 6,  
388 2012, but due to a programming glitch, several collars stopped collecting data prematurely (Table S1).  
389 In total, we collected 483 days of GPS data, and 506 nights of accelerometry data. We also collected  
390 high-resolution drone imagery of the group's most commonly used sleep site (see Strandburg-Peshkin  
391 et al., 2017 for details).

### 392 *Sleep Analysis*

393 We used the accelerometry data to classify sleep behavior by adapting a method presented in  
394 van Hees et al. 2018 that was developed for extracting metrics of sleep in humans from wearable  
395 accelerometry devices. The process of determining the sleep period, defined as the period from sleep  
396 onset to waking, is summarized in Fig. 5.

397 To uniformize the accelerometry sampling schedule, we down-sampled and interpolated the  
398 daytime accelerometry data such that it matched the 10 Hz bursts of accelerometry collected during  
399 the night. We calculated the vectorial dynamic body acceleration (VeDBA) using a 0.7-second time-  
400 window and generated the log of the average VeDBA for the 2.5-second burst each minute. We then  
401 calculated a rolling median of the log VeDBA with a 9-minute window. Following van Hees et al.  
402 2018, continuous periods of at least 30 minutes during which the rolling median of the log VeDBA  
403 was less than the 10<sup>th</sup> percentile of the log VeDBA multiplied by 1.125 were considered sleep blocks.  
404 Any blocks within 45 minutes of each other were merged into sleep periods. If this resulted in more  
405 than one sleep period, the longest sleep period in the day, defined as a noon-to-noon period, was  
406 considered the sleep period. The beginning and end of the sleep period represents the time of sleep  
407 onset and waking, respectively. Of the 506 baboon-nights of accelerometry data, we successfully  
408 calculated the sleep period for 491 baboon-nights.

409

410 [Figure 5]

411 Adapting the method developed by van Hees and colleagues (2015), we classified each  
412 minute epoch both within and outside of the sleep period as representing either sleep or waking  
413 behavior. As above, the 10<sup>th</sup> percentile of the log VeDBA multiplied by 1.125 served as the  
414 classification threshold, and we classified epochs as indicating sleep when the log VeDBA for at least  
415 three consecutive epochs was below the log VeDBA threshold value. We classified all other epochs as  
416 representing waking behavior. Consistent with previous sleep analyses, we measured total sleep time  
417 as the total number of minutes of sleep epochs during the sleep period. We measured sleep efficiency  
418 as the total sleep time divided by the duration of the sleep period. We measured sleep time during the  
419 day – time spent napping – as the number of minutes of sleep epochs from 07:30 to 17:30, as these  
420 times were reliably within the waking period (Fig. 1C), and using standardized times prevented a  
421 spurious negative correlation between time spent sleeping during the waking period and total sleep  
422 time during the sleep period that would result from the waking period prior to or following short sleep  
423 periods having a greater number of potential epochs that could be considered sleep.

424 The accelerometer units occasionally failed to collect data according to their programmed  
425 sampling schedule. Because insufficient data in a given day would prevent a reliable calculation of the  
426 threshold value for the sleep classification and produce variability in the number of potential sleep  
427 epochs, we did not include data for total sleep time, sleep onset time, waking time, or napping time  
428 (both on the prior day and following day) from noon-to-noon periods missing at least 120 (8.3%)  
429 accelerometry bursts, which decreased the number of baboon-nights from 491 to 368. We further  
430 removed data for total sleep time, onset time, and waking time from noon-to-noon periods missing at  
431 least 20 consecutive accelerometry bursts, as the determination of the sleep period is sensitive to gaps  
432 between consecutive accelerometry bursts, resulting in a final number of 354 sleep periods analyzed.  
433 We did not remove data for napping time on these days because measuring napping time did not  
434 depend on the determination of the sleep period.

#### 435 *Validation of sleep classification algorithm*

436 The algorithm from which the sleep classification technique is adapted is well-validated using  
437 polysomnography (C-statistic = 0.83 – 0.86) to both classify sleep behavior and determine the sleep  
438 period in humans (van Hees et al., 2015, 2018). Although the classification of sleep in non-human  
439 primates using devices and algorithms that were validated with polysomnography only in humans has  
440 become a common practice in sleep research (Barrett et al., 2009; Brucher & Nader, 2013; Reinhardt  
441 et al., 2019; Reyes et al., 2021; Samson et al., 2018; Sri Kantha & Suzuki, 2006; Zhdanova et al.,  
442 2002), we returned to the study site in July 2019 to validate the accelerometer-based sleep  
443 classification. Because logistical and ethical limitations prevent the use of polysomnography in free-  
444 ranging, highly dexterous animals, we compared the accelerometer-based sleep classification to direct  
445 observations of wakeful and sleeping baboons fit with accelerometer collars for validation, as  
446 suggested by Rattenborg and colleagues (2017). Behavioral observations were facilitated by high-  
447 resolution thermal imagery (FLIR T1020, FLIR Systems Inc., Wilsonville, OR, USA). The validation  
448 study determined that our accelerometry-based classification of sleep exhibits a 79.9% accuracy  
449 (Table S12; see Supplemental Information for further details of validation study).

#### 450 *Physical activity*

451 Using the GPS data, we calculated each individual's daily travel distance. To avoid  
452 accumulation of GPS positional error overestimating the actual daily travel distance, we calculated  
453 daily travel distance only after discretizing the GPS data to 5-meter resolution (Strandburg-Peshkin et  
454 al., 2017). We removed travel distance data on days on which a baboon's GPS collar first began  
455 taking fixes later than 07:30 or took its last fix before 17:00. Between these times, the group was often  
456 on the move, and thus delayed onset and premature offset of GPS devices that infringed upon this  
457 period would likely underestimate travel distances. We further removed one individual's data from  
458 the first half of the study due to a temporary collar malorientation that resulted in exaggerated GPS  
459 error.

460 We also calculated cumulative activity during the day from the accelerometry data. Using the  
461 continuous 12 Hz accelerometry data, we calculated VeDBA from 06:00 to 18:00 using a 0.5 second  
462 time window, averaged VeDBA over each minute, and then summed these values to generate a  
463 cumulative measure of activity during the day.

#### 464 *Sleep location characterization and fidelity*

465 Visualization of the GPS data indicated that individuals remained reliably stationary until at  
466 least 06:15 every day, and thus we determined the location in which each baboon slept from the  
467 median of the first 10 GPS locations that occurred before 06:15. If an individual's GPS collar did not  
468 successfully collect 10 locations before 06:15, its data on this day were excluded from analyses  
469 involving sleep location. This resulted in the removal of 9/483 baboon-days of data. In ArcGIS, drone  
470 imagery was used to trace the crowns of distinct sleep trees within the group's main sleep site. We  
471 determined that an individual slept in a particular tree if its sleep location was within the traced  
472 polygon of that tree crown. Sleep locations that fell outside the crown of a tree, likely reflecting minor  
473 error in the GPS location estimates, were assigned to the closest sleeping tree. Only 32/469 sleep  
474 locations (6.8%) had to be assigned to a sleep tree in this manner. In rare cases where an individual's  
475 sleep location was greater than 10 m from the crown of the closest sleep tree (5/474 cases – 1.1% of  
476 baboon-days), its data on this day were excluded from analysis.

477 Analysis of the sleep location data revealed that, over the course of the study, the baboons  
478 slept in two distinct sleep sites that were separated by approximately 1.5 km. The group slept at their  
479 main sleep site for the first 21 nights of the study, and then spent three nights in a different sleep site  
480 after a failed leopard attack on the 21<sup>st</sup> study night. The group then returned to the main site for the  
481 duration of the study. In total, they spent 32/35 (91.4%) nights at their main site and 3/35 (8.6%)  
482 nights at the alternate sleep site. While the entire group slept in a single tree at the less frequently used  
483 sleep site, the group's main sleep site contained 10 trees across which the group slept. We performed  
484 a permutation test to investigate whether individuals exhibited consistency in the tree in which they  
485 chose to sleep. We calculated the Shannon entropy of each individual's sleep tree usage, and we  
486 compared these Shannon entropies to those produced from each of 1000 random exchanges of the  
487 locations of individuals on each night. Permuted values provide a null distribution controlling for  
488 potential sleep tree usage, as the distribution of individuals across the sleep trees each night from the  
489 empirical data was maintained in the permuted data. Shannon entropy is a measure of the uncertainty  
490 of a random variable, and is given by the equation:

$$491 \quad H(X) = - \sum_{X=x} p(x) \log(p(x))$$

492 Thus, a lower Shannon entropy in the empirical data compared to the permuted data in this context  
493 would signal sleep tree fidelity, with an individual sleeping more often in certain trees and less often  
494 in other trees than expected by chance. To determine whether the baboons exhibited significant sleep  
495 tree fidelity, we compared the distribution of the group's empirical entropies to the distribution of

496 entropies produced from the permutations with a one-tailed two-sample Kolmogorov-Smirnov test.  
497 As determining fidelity requires several nights of data, we did not include entropy values, either  
498 empirical or permuted, from individuals with less than four nights of data. We also limited this  
499 analysis of tree fidelity to the first 15 days of data, as the number of individuals on which we have  
500 data decreases sharply after this day (Table S1), which decreases the possible permutations.

501 After determining that individuals showed non-random sleep tree selection (see Results), we  
502 then calculated an individual-specific fidelity index for each tree. This fidelity index was measured as  
503 the average number of nights an individual slept in a particular tree in the 1000 permutations  
504 subtracted from the number of nights the individual actually slept in that particular tree. Again, we did  
505 not calculate fidelity indices for individuals with less than four nights of data.

#### 506 *Pattern of sleep-wake behavior across the group*

507 We tested whether individuals staggered their periods of nocturnal wakefulness or,  
508 conversely, synchronized them beyond the level expected by chance. For this analysis, we subset the  
509 data to times between 21:00 and 05:00, as these times consistently fell within the bounds of the sleep  
510 period of all individuals. We calculated the proportion of minute epochs across all nights in which at  
511 least one group member was awake and the proportion of the group that was synchronized in their  
512 behavior (either sleep or wakefulness) during each minute epoch, averaging across all epochs. We  
513 then calculated these same proportions, but after applying a random time shift to each individual's  
514 time series of sleep-wake epochs on each night (Fig. S9). We repeated this procedure 1000 times to  
515 develop a null distribution of the proportion of epochs during the night in which at least one  
516 individual is awake and a null distribution of the average proportion of the group that was  
517 synchronized, and we compared the empirical proportions to their respective null distributions  
518 statistically with a Fisher's exact test. The p-value thus represents the proportion of time-shifted  
519 values that were as extreme or more extreme than the empirical value. Shifting the data in time rather  
520 than permuting it allowed us to develop null distributions while maintaining the autocorrelation  
521 structure of the data.

522 To confirm the robustness of our findings, we again tested for collective vigilance and  
523 synchronization, comparing the empirical values defined above to null distributions produced using an  
524 alternative method. In this method, rather than applying a random time shift to each night of each  
525 individual's data, we maintained the real time associated with the time series data, but we permuted  
526 the night associated with each time series (Fig. S10). We compared empirical values to the null  
527 distributions created by these night permutations with a Fisher's exact test.

#### 528 *Statistical analysis of sleep*

529 Data were processed using the statistical analysis software R version 4.0.5 (R Core Team,  
530 2021). We only included the first 20 study nights in the analyses of sleep, except where specified, due  
531 to concerns that the leopard attack that occurred on the 21<sup>st</sup> night could potentially disrupt typical  
532 sleep patterns. To compare the effects of various physiological, ecological, and social predictors of

533 sleep, we modeled total sleep time with a Bayesian linear mixed model (LMM), with random effects  
534 of individual identity and night, and fixed effects of age, sex, distance traveled in the preceding day,  
535 napping time during the preceding day, relative time spent sleeping the previous night, the identity of  
536 the sleep tree, fidelity index for the current sleep tree, the relative number of individuals in the sleep  
537 tree, the phase of the moon, and minimum ambient temperature during the night. We created a  
538 separate model that included cumulative VeDBA instead of distance travelled because cumulative  
539 daytime VeDBA was highly correlated with distance travelled during the day. An individual's relative  
540 time spent sleeping the previous night was measured as the difference between its total sleep time on  
541 the previous night and its average total sleep time. This relative measure controlled for positive  
542 correlations between total sleep time on previous night and current night total sleep time that would  
543 result purely from among-individual variation in total sleep time – a scenario that would not be  
544 sufficiently controlled for by the individual identity random effect in this model. We calculated the  
545 relative number of individuals in the sleep tree by dividing the number of individuals in the sleep tree  
546 by the total number of individuals who were successfully assigned to a sleep tree on that given night,  
547 to control for the decrease in the number of individuals in each sleep tree over the course of the study  
548 that resulted from premature termination of data collection in several collars. Moon phase was a  
549 continuous variable realizing values from 0 to 1 (with 0 representing a new moon, and 1 representing  
550 a full moon), and we collected this data for the days of the study using the sunCalc package in R  
551 (Benoit & Elmarhraoui, 2019). The minimum ambient temperature represented the minimum  
552 temperature at the sleep site during the night, determined using interpolated ECMWF air temperature  
553 (2 m above ground) data obtained with the Env-DATA functionality (Dodge et al., 2013) provided on  
554 Movebank data repository ([www.movebank.org](http://www.movebank.org)). We standardized all response and predictor  
555 variables to allow for comparison of effect sizes among variables. To increase the interpretability of  
556 the total sleep time model, we reran the model without standardized variables. Effect sizes reported in  
557 the main text are derived from the standardized model, whereas figures produced in the main text, as  
558 well as the interpretation of the effect of each variable on the unstandardized sleep time are derived  
559 from the model with unstandardized variables.

560 To examine the effect of the leopard attack and subsequent sleep site change on sleep  
561 parameters, we modeled the effect of particular nights on sleep parameters with a Bayesian LMM.  
562 Specifically, we divided data into the following categories: all nights before the leopard attack, the  
563 night of the leopard attack, the first night in the new sleep site (i.e. the night following the leopard  
564 attack), the second night in the new sleep site, the third night in the new sleep site, and the remainder  
565 of study nights, during which the group slept in its main sleep site. Aside from this categorical night  
566 variable, we also included age, sex, distance traveled in the preceding day, napping time during the  
567 preceding day, relative time spent sleeping the previous night, the phase of the moon, and minimum  
568 ambient temperature as fixed effects in the models with random intercepts for individual identity. In

569 these models, we did not include sleep tree identity, number of individuals in the sleep tree, and sleep  
570 tree fidelity score, as the entire group slept in a single tree in the less commonly used sleep site.

571 We further tested for the effect of prior sleep debt on sleep behavior by modeling the effect of  
572 total sleep time on time spent napping the following day. We modeled this relationship with a  
573 Bayesian LMM, using individual identity and day as random intercepts. We also assessed how the  
574 likelihood of sleep progressed through the night. We used a generalized additive mixed model  
575 (GAMM) to model the log-odds of a baboon being asleep in a given epoch as a function of the  
576 duration of that epoch from the beginning of the sleep period, scaled such that 0 represents the  
577 beginning of the sleep period and 1 represents the end of the sleep period. We included individual  
578 identity and night as random intercepts, and to account for autocorrelation in the response variable, we  
579 also included an AR1 term in the model.

580 Lastly, we tested whether individuals showed higher synchronization of their sleep-wake  
581 patterns when sharing the same sleep tree than when inhabiting different trees. With a Bayesian  
582 LMM, we modeled the synchronization score between dyads on each night, calculated as the number  
583 of minutes from 21:00 to 05:00 in which members of the dyad exhibited the same behavior divided by  
584 the total number minutes in which both individuals had data. We included a binary predictor variable  
585 indicating whether dyad members were in the same tree as the only fixed effect variable, and night,  
586 the identity of both individuals in the dyad, as well as the identity of the dyad as random intercept  
587 variables.

588 We carried out all Bayesian analyses with the “brms” package in R (Bürkner, 2017). We used  
589 diffuse, mean-zero Gaussian priors for all predictor variables. Model estimates are based off of four  
590 independent Hamiltonian Monte Carlo chains with 5000 iterations, 2500 of which were burn-in  
591 iterations. Trace plots indicated that mixing was sufficient and that the four chains converged on the  
592 same posterior region. Model estimates reported in the text represent the mean of the posterior  
593 distribution, along with the lower and upper 95% credible interval bounds from the standardized  
594 models. We used package “mgcv” in R (Wood, 2011) to fit the GAMM to the sleep epoch data, using  
595 a thin plate spline smoothing term with 10 knots.

## 596 **Acknowledgments**

597 We are grateful to the Kenya National Science and Technology Council  
598 (NCTS/RCD/12B/012/26B, NACOSTI/P/15/5727/4608, NACOSTI/P/19/55517/24299,  
599 NACOSTI/P/20/1407), Kenyan Wildlife Service (KWS/BRM/5001), and Mpala Research Centre for  
600 permission to conduct research. Research procedures received IACUC approval (Smithsonian  
601 Tropical Research Institute, assurance number 2012.0601.2015; University of California, Davis,  
602 assurance number 20442). We thank Ariana Strandburg-Peshkin, Alison Ashbury, and Niels  
603 Rattenborg for helpful comments on previous drafts of the manuscript. We thank M Wikelski, E  
604 Bermingham, D Rubenstein, M Kinnaird, D Carlino, and B Tripart for logistical support, as well as R  
605 Kays, S Murray, M Mutinda, R Lessnau, S Alavi, J Nairobi, F Kuemmeth, and W Heidrich for field



606 assistance. This research received funding from the Max Planck Institute for Ornithology, the  
607 Smithsonian Tropical Research Institute, and University of California, Davis. RH and MCC were  
608 supported by the National Science Foundation (IIS 1514174 & IOS 1250895). MCC received  
609 additional support from a Packard Foundation Fellowship (2016-65130), and the Alexander von  
610 Humboldt Foundation in the framework of the Alexander von Humboldt Professorship endowed by  
611 the Federal Ministry of Education and Research. JCL was supported by a National Science  
612 Foundation Graduate Research Fellowship, the National Science Foundation Graduate Research  
613 Internship Program, a Dean's Distinguished Graduate Fellowship from the University of California,  
614 Davis, and a Richard G. Coss Wildlife Research Fellowship. Further support for the project was also  
615 provided by the Center for the Advanced Study of Collective Behavior at the University of Konstanz,  
616 Deutsche Forschungsgemeinschaft Centre of Excellence 2117 (ID: 422037984).

#### 617 **Author Contributions**

618 J.C.L., R.H., and M.C.C. conceived the project. M.C.C. oversaw the data collection. J.C.L.,  
619 R.H., and C.L.N analyzed the data and prepared the figures. J.C.L. led the writing of the manuscript,  
620 to which all authors contributed.

#### 621 **Competing interests**

622 The authors declare no competing interests.

#### 623 **Data availability**

624 GPS and accelerometry data generated during this study are published and available in the  
625 Movebank repository ([www.movebank.org](http://www.movebank.org); Crofoot et al. 2021). Drone imagery is publicly available  
626 for download from Dryad (<http://dx.doi.org/10.5061/dryad.6h5b7>). Accelerometry data and  
627 behavioral scoring data from the 2019 sleep validation study is also publicly available for download  
628 from Dryad (<https://doi.org/10.5061/dryad.p5hqbzkqf>).

629

#### 630 **References**

- 631 Altmann, S. A., & Altmann, J. (1970). *Baboon ecology: African field research*. University of Chicago  
632 Press, Chicago.
- 633 Amlaner, C. J., Phil, D., & Fuller, P. M. (2009). *Basics of sleep guide*. Sleep Research Society.
- 634 Ancoli-Israel, S., Cole, R., Alessi, C., Chambers, M., Moorcroft, W., & Pollak, C. P. (2003). The Role  
635 of Actigraphy in the Study of Sleep and Circadian Rhythms. *Sleep*, 26(3), 342–392.  
636 <https://doi.org/10.1093/sleep/26.3.342>
- 637 Aulsebrook, A. E., Jones, T. M., Rattenborg, N. C., Roth, T. C., & Lesku, J. A. (2016). Sleep  
638 Ecophysiology: Integrating Neuroscience and Ecology. *Trends in Ecology & Evolution*,  
639 31(8), 590–599. <https://doi.org/10.1016/j.tree.2016.05.004>

- 640 Bäckman, J., Andersson, A., Pedersen, L., Sjöberg, S., Tøttrup, A. P., & Alerstam, T. (2017).  
641 Actogram analysis of free-flying migratory birds: New perspectives based on acceleration  
642 logging. *Journal of Comparative Physiology A*, 203(6–7), 543–564.  
643 <https://doi.org/10.1007/s00359-017-1165-9>
- 644 Barrett, C. E., Noble, P., Hanson, E., Pine, D. S., Winslow, J. T., & Nelson, E. E. (2009). Early  
645 adverse rearing experiences alter sleep–wake patterns and plasma cortisol levels in juvenile  
646 rhesus monkeys. *Psychoneuroendocrinology*, 34(7), 1029–1040.  
647 <https://doi.org/10.1016/j.psyneuen.2009.02.002>
- 648 Basner, M., Rao, H., Goel, N., & Dinges, D. F. (2013). Sleep deprivation and neurobehavioral  
649 dynamics. *Current Opinion in Neurobiology*, 23(5), 854–863.  
650 <https://doi.org/10.1016/j.conb.2013.02.008>
- 651 Benoit, T., & Elmarhraoui, A. (2019). *suncalc: Compute Sun Position, Sunlight Phases, Moon*  
652 *Position and Lunar Phase* (R package version 0.5.0) [Computer software]. [https://CRAN.R-](https://CRAN.R-project.org/package=suncalc)  
653 [project.org/package=suncalc](https://CRAN.R-project.org/package=suncalc)
- 654 Brain, C. K. (1983). *The hunters or the hunted?: An introduction to African cave taphonomy*.  
655 University of Chicago Press.
- 656 Brucher, R. E., & Nader, M. A. (2013). The relationship between cocaine self-administration and  
657 actigraphy-based measures of sleep in adult rhesus monkeys. *Psychopharmacology*, 229(2),  
658 267–274. <https://doi.org/10.1007/s00213-013-3101-1>
- 659 Bürkner, P.-C. (2017). brms: An R Package for Bayesian Multilevel Models Using Stan. *Journal of*  
660 *Statistical Software*, 80(1), 1–28. <https://doi.org/10.18637/jss.v080.i01>
- 661 Busse, C. (1980). Leopard and lion predation upon chacma baboons living in the Moremi Wildlife  
662 Reserve. *Botswana Notes and Records*, 15–21.
- 663 Cameron, E. Z., Setsaas, T. H., & Linklater, W. L. (2009). Social bonds between unrelated females  
664 increase reproductive success in feral horses. *Proceedings of the National Academy of*  
665 *Sciences*, 106(33), 13850–13853. <https://doi.org/10.1073/pnas.0900639106>
- 666 Campos, F. A., Villavicencio, F., Archie, E. A., Colchero, F., & Alberts, S. C. (2020). Social bonds,  
667 social status and survival in wild baboons: A tale of two sexes. *Philosophical Transactions of*

- 668            *the Royal Society B: Biological Sciences*, 375(1811), 20190621.  
669            <https://doi.org/10.1098/rstb.2019.0621>
- 670 Cheney, D. L., & Seyfarth, R. M. (2008). *Baboon metaphysics: The evolution of a social mind*.  
671            University of Chicago Press.
- 672 Cheney, D. L., Seyfarth, R. M., Fischer, J., Beehner, J., Bergman, T., Johnson, S. E., Kitchen, D. M.,  
673            Palombit, R. A., Rendall, D., & Silk, J. B. (2004). Factors affecting reproduction and  
674            mortality among baboons in the Okavango Delta, Botswana. *International Journal of*  
675            *Primatology*, 25(2), 401–428.
- 676 Chowdhury, B., & Shafer, O. T. (2020). Why the young sleep longer. *ELife*, 9, e56833.  
677            <https://doi.org/10.7554/eLife.56833>
- 678 Cirelli, C., & Tononi, G. (2008). Is Sleep Essential? *PLOS Biology*, 6(8), e216.  
679            <https://doi.org/10.1371/journal.pbio.0060216>
- 680 Cowlishaw, G. (1994). Vulnerability To Predation in Baboon Populations. *Behaviour*, 131(3–4), 293–  
681            304. <https://doi.org/10.1163/156853994X00488>
- 682 Davimes, J. G., Alagaili, A. N., Bhagwandin, A., Bertelsen, M. F., Mohammed, O. B., Bennett, N. C.,  
683            Manger, P. R., & Gravett, N. (2018). Seasonal variations in sleep of free-ranging Arabian  
684            oryx (*Oryx leucoryx*) under natural hyperarid conditions. *Sleep*, 41(5).  
685            <https://doi.org/10.1093/sleep/zsy038>
- 686 de Souza, L., Benedito-Silva, A. A., Pires, M. L. N., Poyares, D., Tufik, S., & Calil, H. M. (2003).  
687            Further Validation of Actigraphy for Sleep Studies. *Sleep*, 26(1), 81–85.  
688            <https://doi.org/10.1093/sleep/26.1.81>
- 689 Dement, W. (1960). The Effect of Dream Deprivation. *Science*, 131(3415), 1705–1707.
- 690 Dodge, S., Bohrer, G., Weinzierl, R., Davidson, S. C., Kays, R., Douglas, D., Cruz, S., Han, J.,  
691            Brandes, D., & Wikelski, M. (2013). The environmental-data automated track annotation  
692            (Env-DATA) system: Linking animal tracks with environmental data. *Movement Ecology*,  
693            1(1), 3. <https://doi.org/10.1186/2051-3933-1-3>
- 694 Dunbar, R. I. (1992). Time: A hidden constraint on the behavioural ecology of baboons. *Behavioral*  
695            *Ecology and Sociobiology*, 31(1), 35–49.

- 696 Forrester, T. D., Casady, D. S., & Wittmer, H. U. (2015). Home sweet home: Fitness consequences of  
697 site familiarity in female black-tailed deer. *Behavioral Ecology and Sociobiology*, *69*(4), 603–  
698 612. <https://doi.org/10.1007/s00265-014-1871-z>
- 699 Frère, C. H., Krützen, M., Mann, J., Connor, R. C., Bejder, L., & Sherwin, W. B. (2010). Social and  
700 genetic interactions drive fitness variation in a free-living dolphin population. *Proceedings of*  
701 *the National Academy of Sciences*, *107*(46), 19949–19954.  
702 <https://doi.org/10.1073/pnas.1007997107>
- 703 Gangwisch, J. E. (2014). A Review of Evidence for the Link Between Sleep Duration and  
704 Hypertension. *American Journal of Hypertension*, *27*(10), 1235–1242.  
705 <https://doi.org/10.1093/ajh/hpu071>
- 706 Gehr, B., Bonnot, N. C., Heurich, M., Cagnacci, F., Ciuti, S., Hewison, A. M., Gaillard, J.-M., Ranc,  
707 N., Premier, J., & Vogt, K. (2020). Stay home, stay safe—Site familiarity reduces predation  
708 risk in a large herbivore in two contrasting study sites. *Journal of Animal Ecology*, *89*(6),  
709 1329–1339.
- 710 Gravett, N., Bhagwandin, A., Sutcliffe, R., Landen, K., Chase, M. J., Lyamin, O. I., Siegel, J. M., &  
711 Manger, P. R. (2017). Inactivity/sleep in two wild free-roaming African elephant matriarchs –  
712 Does large body size make elephants the shortest mammalian sleepers? *PLOS ONE*, *12*(3),  
713 e0171903. <https://doi.org/10.1371/journal.pone.0171903>
- 714 Hayward, M. W., Henschel, P., O'Brien, J., Hofmeyr, M., Balme, G., & Kerley, G. I. H. (2006). Prey  
715 preferences of the leopard (*Panthera pardus*). *Journal of Zoology*, *270*(2), 298–313.  
716 <https://doi.org/10.1111/j.1469-7998.2006.00139.x>
- 717 Hoffmann, K., Coolen, A., Schlumbohm, C., Meerlo, P., & Fuchs, E. (2012). Remote long-term  
718 registrations of sleep-wake rhythms, core body temperature and activity in marmoset  
719 monkeys. *Behavioural Brain Research*, *235*(2), 113–123.  
720 <https://doi.org/10.1016/j.bbr.2012.07.033>
- 721 Isbell, L. A., Bidner, L. R., Van Cleave, E. K., Matsumoto-Oda, A., & Crofoot, M. C. (2018). GPS-  
722 identified vulnerabilities of savannah-woodland primates to leopard predation and their

- 723 implications for early hominins. *Journal of Human Evolution*, *118*, 1–13.
- 724 <https://doi.org/10.1016/j.jhevol.2018.02.003>
- 725 Jones, S. E., van Hees, V. T., Mazzotti, D. R., Marques-Vidal, P., Sabia, S., van der Spek, A., Dashti,  
726 H. S., Engmann, J., Kocavska, D., Tyrrell, J., Beaumont, R. N., Hillsdon, M., Ruth, K. S.,  
727 Tuke, M. A., Yaghootkar, H., Sharp, S. A., Ji, Y., Harrison, J. W., Freathy, R. M., ... Wood,  
728 A. R. (2019). Genetic studies of accelerometer-based sleep measures yield new insights into  
729 human sleep behaviour. *Nature Communications*, *10*(1), 1585.  
730 <https://doi.org/10.1038/s41467-019-09576-1>
- 731 Kanady, J. C., Drummond, S. P. A., & Mednick, S. C. (2011). Actigraphic assessment of a  
732 polysomnographic-recorded nap: A validation study. *Journal of Sleep Research*, *20*(1pt2),  
733 214–222. <https://doi.org/10.1111/j.1365-2869.2010.00858.x>
- 734 Karamihalev, S., Flachskamm, C., Eren, N., Kimura, M., & Chen, A. (2019). Social context and  
735 dominance status contribute to sleep patterns and quality in groups of freely-moving mice.  
736 *Scientific Reports*, *9*(1), 15190. <https://doi.org/10.1038/s41598-019-51375-7>
- 737 King, A. J., Isaac, N. J., & Cowlshaw, G. (2009). Ecological, social, and reproductive factors shape  
738 producer–scrounger dynamics in baboons. *Behavioral Ecology*, *20*(5), 1039–1049.
- 739 Kitamura, S., Katayose, Y., Nakazaki, K., Motomura, Y., Oba, K., Katsunuma, R., Terasawa, Y.,  
740 Enomoto, M., Moriguchi, Y., Hida, A., & Mishima, K. (2016). Estimating individual optimal  
741 sleep duration and potential sleep debt. *Scientific Reports*, *6*(1), 35812.  
742 <https://doi.org/10.1038/srep35812>
- 743 Knutson, K. L. (2014). Sleep duration, quality, and timing and their associations with age in a  
744 community without electricity in haiti. *American Journal of Human Biology*, *26*(1), 80–86.  
745 <https://doi.org/10.1002/ajhb.22481>
- 746 Ladha, C., & Hoffman, C. L. (2018). A Combined Approach to Predicting Rest in Dogs Using  
747 Accelerometers. *Sensors*, *18*(8), 2649. <https://doi.org/10.3390/s18082649>
- 748 Lehtonen, J., & Jaatinen, K. (2016). Safety in numbers: The dilution effect and other drivers of group  
749 life in the face of danger. *Behavioral Ecology and Sociobiology*, *70*(4), 449–458.  
750 <https://doi.org/10.1007/s00265-016-2075-5>

- 751 Lendrem, D. W. (1983). Sleeping and vigilance in birds. I. Field observations of the mallard (*Anas*  
752 *platyrhynchos*). *Animal Behaviour*. [https://agris.fao.org/agris-](https://agris.fao.org/agris-search/search.do?recordID=US201302605924)  
753 [search/search.do?recordID=US201302605924](https://agris.fao.org/agris-search/search.do?recordID=US201302605924)
- 754 Lesku, J. A., Meyer, L. C. R., Fuller, A., Maloney, S. K., Dell’Omo, G., Vyssotski, A. L., &  
755 Rattenborg, N. C. (2011). Ostriches Sleep like Platypuses. *PLOS ONE*, *6*(8), e23203.  
756 <https://doi.org/10.1371/journal.pone.0023203>
- 757 Lesku, J. A., Rattenborg, N. C., Valcu, M., Vyssotski, A. L., Kuhn, S., Kuemmeth, F., Heidrich, W.,  
758 & Kempnaers, B. (2012). Adaptive Sleep Loss in Polygynous Pectoral Sandpipers. *Science*,  
759 *337*(6102), 1654–1658. <https://doi.org/10.1126/science.1220939>
- 760 Lima, S. L., Rattenborg, N. C., Lesku, J. A., & Amlaner, C. J. (2005). Sleeping under the risk of  
761 predation. *Animal Behaviour*, *70*(4), 723–736. <https://doi.org/10.1016/j.anbehav.2005.01.008>
- 762 Lin, B., Foxfoot, I. R., Miller, C. M., Venkatamaran, V. V., Kerby, J. T., Bechtold, E. K., Kellogg, B.  
763 S., Nguyen, N., & Fashing, P. J. (2020). Leopard predation on gelada monkeys at Guassa,  
764 Ethiopia. *American Journal of Primatology*, *82*(2), e23098. <https://doi.org/10.1002/ajp.23098>
- 765 Lyamin, O. I., Kosenko, P. O., Korneva, S. M., Vyssotski, A. L., Mukhametov, L. M., & Siegel, J. M.  
766 (2018). Fur Seals Suppress REM Sleep for Very Long Periods without Subsequent Rebound.  
767 *Current Biology*, *28*(12), 2000–2005.e2. <https://doi.org/10.1016/j.cub.2018.05.022>
- 768 Malungo, I. B., Gravett, N., Bhagwandin, A., Davimes, J. G., & Manger, P. R. (2021). Sleep in two  
769 free-roaming blue wildebeest (*Connochaetes taurinus*), with observations on the agreement of  
770 polysomnographic and actigraphic techniques. *IBRO Neuroscience Reports*, *10*, 142–152.  
771 <https://doi.org/10.1016/j.ibneur.2021.02.005>
- 772 Marshall, H. H., Carter, A. J., Ashford, A., Rowcliffe, J. M., & Cowlishaw, G. (2015). Social effects  
773 on foraging behavior and success depend on local environmental conditions. *Ecology and*  
774 *Evolution*, *5*(2), 475–492.
- 775 Miller, P. J. O., Aoki, K., Rendell, L. E., & Amano, M. (2008). Stereotypical resting behavior of the  
776 sperm whale. *Current Biology*, *18*(1), R21–R23. <https://doi.org/10.1016/j.cub.2007.11.003>

- 777 Mitani, Y., Andrews, R. D., Sato, K., Kato, A., Naito, Y., & Costa, D. P. (2010). Three-dimensional  
778 resting behaviour of northern elephant seals: Drifting like a falling leaf. *Biology Letters*, *6*(2),  
779 163–166. <https://doi.org/10.1098/rsbl.2009.0719>
- 780 Mong, J. A., & Cusmano, D. M. (2016). Sex differences in sleep: Impact of biological sex and sex  
781 steroids. *Philosophical Transactions of the Royal Society B: Biological Sciences*, *371*(1688),  
782 20150110. <https://doi.org/10.1098/rstb.2015.0110>
- 783 Nunn, C. L., & Samson, D. R. (2018). Sleep in a comparative context: Investigating how human sleep  
784 differs from sleep in other primates. *American Journal of Physical Anthropology*, *166*(3),  
785 601–612. <https://doi.org/10.1002/ajpa.23427>
- 786 Nunn, C. L., Samson, D. R., & Krystal, A. D. (2016). Shining evolutionary light on human sleep and  
787 sleep disorders. *Evolution, Medicine, and Public Health*, *2016*(1), 227–243.  
788 <https://doi.org/10.1093/emph/eow018>
- 789 Ohayon, M. M., Carskadon, M. A., Guilleminault, C., & Vitiello, M. V. (2004). Meta-Analysis of  
790 Quantitative Sleep Parameters From Childhood to Old Age in Healthy Individuals:  
791 Developing Normative Sleep Values Across the Human Lifespan. *Sleep*, *27*(7), 1255–1273.  
792 <https://doi.org/10.1093/sleep/27.7.1255>
- 793 Olds, T., Blunden, S., Petkov, J., & Forchino, F. (2010). The relationships between sex, age,  
794 geography and time in bed in adolescents: A meta-analysis of data from 23 countries. *Sleep*  
795 *Medicine Reviews*, *14*(6), 371–378. <https://doi.org/10.1016/j.smr.2009.12.002>
- 796 Patel, S. I., Miller, B. W., Kosiorek, H. E., Parish, J. M., Lyng, P. J., & Krahn, L. E. (2017). The  
797 Effect of Dogs on Human Sleep in the Home Sleep Environment. *Mayo Clinic Proceedings*,  
798 *92*(9), 1368–1372. <https://doi.org/10.1016/j.mayocp.2017.06.014>
- 799 Qasem, L., Cardew, A., Wilson, A., Griffiths, I., Halsey, L. G., Shepard, E. L., Gleiss, A. C., &  
800 Wilson, R. (2012). Tri-axial dynamic acceleration as a proxy for animal energy expenditure;  
801 should we be summing values or calculating the vector? *PloS One*, *7*(2), e31187.
- 802 Qin, D.-D., Feng, S.-F., Zhang, F.-Y., Wang, N., Sun, W.-J., Zhou, Y., Xiong, T.-F., Xu, X.-L., Yang,  
803 X.-T., Zhang, X., Zhu, X., Hu, X.-T., Xiong, L., Liu, Y., & Chen, Y.-C. (2020). Potential use  
804 of actigraphy to measure sleep in monkeys: Comparison with behavioral analysis from

- 805           videography. *Zoological Research*, 41(4), 437–443. <https://doi.org/10.24272/j.issn.2095->  
806           8137.2020.056
- 807   R Core Team. (2021). *R: A language and environment for statistical computing*. R Foundation for  
808           *Statistical Computing* (4.0.5) [Computer software]. R Foundation for Statistical Computing.  
809           <https://www.R-project.org/>
- 810   Rattenborg, N. C., de la Iglesia, H. O., Kempnaers, B., Lesku, J. A., Meerlo, P., & Scriba, M. F.  
811           (2017). Sleep research goes wild: New methods and approaches to investigate the ecology,  
812           evolution and functions of sleep. *Philosophical Transactions of the Royal Society B:*  
813           *Biological Sciences*, 372(1734), 20160251.
- 814   Rattenborg, N. C., Voirin, B., Cruz, S. M., Tisdale, R., Dell’Omo, G., Lipp, H.-P., Wikelski, M., &  
815           Vyssotski, A. L. (2016). Evidence that birds sleep in mid-flight. *Nature Communications*,  
816           7(1), 12468. <https://doi.org/10.1038/ncomms12468>
- 817   Rattenborg, N. C., Voirin, B., Vyssotski, A. L., Kays, R. W., Spoelstra, K., Kuemmeth, F., Heidrich,  
818           W., & Wikelski, M. (2008). Sleeping outside the box: Electroencephalographic measures of  
819           sleep in sloths inhabiting a rainforest. *Biology Letters*, 4(4), 402–405.  
820           <https://doi.org/10.1098/rsbl.2008.0203>
- 821   Rechtschaffen, A., & Bergmann, B. M. (2002). Sleep deprivation in the rat: An update of the 1989  
822           paper. *Sleep*, 25(1), 18–24. <https://doi.org/10.1093/sleep/25.1.18>
- 823   Reinhardt, K. D. (2020). Wild primate sleep: Understanding sleep in an ecological context. *Current*  
824           *Opinion in Physiology*, 15, 238–244. <https://doi.org/10.1016/j.cophys.2020.04.002>
- 825   Reinhardt, K. D., Vyazovskiy, V. V., Hernandez-Aguilar, R. A., Imron, M. A., & Nekarlis, K. A.-I.  
826           (2019). Environment shapes sleep patterns in a wild nocturnal primate. *Scientific Reports*,  
827           9(1), 9939. <https://doi.org/10.1038/s41598-019-45852-2>
- 828   Reyes, K. R., Patel, U. A., Nunn, C. L., & Samson, D. R. (2021). Gibbon sleep quantified: The  
829           influence of lunar phase and meteorological variables on activity in *Hylobates moloch* and  
830           *Hylobates pileatus*. *Primates*, 62(5), 749–759. <https://doi.org/10.1007/s10329-021-00920-y>



- 831 Riehl, C., & Strong, M. J. (2018). Stable social relationships between unrelated females increase  
832 individual fitness in a cooperative bird. *Proceedings of the Royal Society B: Biological*  
833 *Sciences*, 285(1876), 20180130. <https://doi.org/10.1098/rspb.2018.0130>
- 834 Roehrs, T., Kapke, A., Roth, T., & Breslau, N. (2006). Sex differences in the polysomnographic sleep  
835 of young adults: A community-based study. *Sleep Medicine*, 7(1), 49–53.  
836 <https://doi.org/10.1016/j.sleep.2005.05.008>
- 837 Roth, T. C., Rattenborg, N. C., & Pravosudov, V. V. (2010). The ecological relevance of sleep: The  
838 trade-off between sleep, memory and energy conservation. *Philosophical Transactions of the*  
839 *Royal Society B: Biological Sciences*, 365(1542), 945–959.  
840 <https://doi.org/10.1098/rstb.2009.0209>
- 841 Samson, D. R., Bray, J., & Nunn, C. L. (2018). The cost of deep sleep: Environmental influences on  
842 sleep regulation are greater for diurnal lemurs. *American Journal of Physical Anthropology*,  
843 166(3), 578–589. <https://doi.org/10.1002/ajpa.23455>
- 844 Samson, D. R., Crittenden, A. N., Mabulla, I. A., Mabulla, A. Z. P., & Nunn, C. L. (2017).  
845 Chronotype variation drives night-time sentinel-like behaviour in hunter–gatherers.  
846 *Proceedings of the Royal Society B: Biological Sciences*, 284(1858), 20170967.  
847 <https://doi.org/10.1098/rspb.2017.0967>
- 848 Samson, D. R., & Nunn, C. L. (2015). Sleep intensity and the evolution of human cognition.  
849 *Evolutionary Anthropology: Issues, News, and Reviews*, 24(6), 225–237.  
850 <https://doi.org/10.1002/evan.21464>
- 851 Scriba, M. F., Ducrest, A.-L., Henry, I., Vyssotski, A. L., Rattenborg, N. C., & Roulin, A. (2013).  
852 Linking melanism to brain development: Expression of a melanism-related gene in barn owl  
853 feather follicles covaries with sleep ontogeny. *Frontiers in Zoology*, 10(1), 42.  
854 <https://doi.org/10.1186/1742-9994-10-42>
- 855 Sellers, W. I., & Crompton, R. H. (2004). Automatic Monitoring of Primate Locomotor Behaviour  
856 Using Accelerometers. *Folia Primatologica*, 75(4), 279–293.  
857 <https://doi.org/10.1159/000078939>

- 858 Shambroom, J. R., Fábregas, S. E., & Johnstone, J. (2012). Validation of an automated wireless  
859 system to monitor sleep in healthy adults. *Journal of Sleep Research*, 21(2), 221–230.  
860 <https://doi.org/10.1111/j.1365-2869.2011.00944.x>
- 861 Shiromani, P. J., Lu, J., Wagner, D., Thakkar, J., Greco, M. A., Basheer, R., & Thakkar, M. (2000).  
862 Compensatory sleep response to 12 h wakefulness in young and old rats. *American Journal*  
863 *of Physiology-Regulatory, Integrative and Comparative Physiology*, 278(1), R125–R133.  
864 <https://doi.org/10.1152/ajpregu.2000.278.1.R125>
- 865 Sick, C., Carter, A. J., Marshall, H. H., Knapp, L. A., Dabelsteen, T., & Cowlshaw, G. (2014).  
866 Evidence for varying social strategies across the day in chacma baboons. *Biology Letters*,  
867 10(7), 20140249.
- 868 Siegel, J. M. (2008). Do all animals sleep? *Trends in Neurosciences*, 31(4), 208–213.
- 869 Silk, J. B., Beehner, J. C., Bergman, T. J., Crockford, C., Engh, A. L., Moscovice, L. R., Wittig, R.  
870 M., Seyfarth, R. M., & Cheney, D. L. (2009). The benefits of social capital: Close social  
871 bonds among female baboons enhance offspring survival. *Proceedings of the Royal Society B:*  
872 *Biological Sciences*, 276(1670), 3099–3104. <https://doi.org/10.1098/rspb.2009.0681>
- 873 Snyder, F. (1966). Toward an evolutionary theory of dreaming. *American Journal of Psychiatry*, 123,  
874 121–136.
- 875 Sri Kantha, S., & Suzuki, J. (2006). Sleep quantitation in common marmoset, cotton top tamarin and  
876 squirrel monkey by non-invasive actigraphy. *Comparative Biochemistry and Physiology Part*  
877 *A: Molecular & Integrative Physiology*, 144(2), 203–210.  
878 <https://doi.org/10.1016/j.cbpa.2006.02.043>
- 879 Steinmeyer, C., Schielzeth, H., Mueller, J. C., & Kempnaers, B. (2010). Variation in sleep behaviour  
880 in free-living blue tits, *Cyanistes caeruleus*: Effects of sex, age and environment. *Animal*  
881 *Behaviour*, 80(5), 853–864. <https://doi.org/10.1016/j.anbehav.2010.08.005>
- 882 Stickgold, R. (2005). Sleep-dependent memory consolidation. *Nature*, 437(7063), 1272–1278.
- 883 Strandburg-Peshkin, A., Farine, D. R., Couzin, I. D., & Crofoot, M. C. (2015). Shared decision-  
884 making drives collective movement in wild baboons. *Science*, 348(6241), 1358–1361.

- 885 Strandburg-Peshkin, A., Farine, D. R., Crofoot, M. C., & Couzin, I. D. (2017). Habitat and social  
886 factors shape individual decisions and emergent group structure during baboon collective  
887 movement. *ELife*, 6, e19505. <https://doi.org/10.7554/eLife.19505>
- 888 Stuber, E. F., Dingemanse, N. J., Kempnaers, B., & Mueller, J. C. (2015). Sources of intraspecific  
889 variation in sleep behaviour of wild great tits. *Animal Behaviour*, 106, 201–221.  
890 <https://doi.org/10.1016/j.anbehav.2015.05.025>
- 891 Suzuki, M., Nakayama, M., Ando, K. B., Arima, S., Nakamura, Y., Yokota, M., & Murakami, S.  
892 (2018). Sleep Disturbance and Hyperactivity Detected by Actigraphy in Rats with Allergic  
893 Rhinitis or Attention-Deficit Hyperactivity Disorder. *The Tohoku Journal of Experimental*  
894 *Medicine*, 246(2), 65–71. <https://doi.org/10.1620/tjem.246.65>
- 895 Tamaki, M., Bang, J. W., Watanabe, T., & Sasaki, Y. (2016). Night Watch in One Brain Hemisphere  
896 during Sleep Associated with the First-Night Effect in Humans. *Current Biology*, 26(9),  
897 1190–1194. <https://doi.org/10.1016/j.cub.2016.02.063>
- 898 Treves, A., & Palmqvist, P. (2007). Reconstructing Hominin Interactions with Mammalian Carnivores  
899 (6.0–1.8 Ma). In S. L. Gursky & K. A. I. Nekaris (Eds.), *Primate Anti-Predator Strategies*  
900 (pp. 355–381). Springer US. [https://doi.org/10.1007/978-0-387-34810-0\\_17](https://doi.org/10.1007/978-0-387-34810-0_17)
- 901 van Hees, V. T., Sabia, S., Anderson, K. N., Denton, S. J., Oliver, J., Catt, M., Abell, J. G., Kivimäki,  
902 M., Trenell, M. I., & Singh-Manoux, A. (2015). A novel, open access method to assess sleep  
903 duration using a wrist-worn accelerometer. *PloS One*, 10(11), e0142533.
- 904 van Hees, V. T., Sabia, S., Jones, S. E., Wood, A. R., Anderson, K. N., Kivimäki, M., Frayling, T. M.,  
905 Pack, A. I., Bucan, M., Trenell, M. I., Mazzotti, D. R., Gehrman, P. R., Singh-Manoux, B. A.,  
906 & Weedon, M. N. (2018). Estimating sleep parameters using an accelerometer without sleep  
907 diary. *Scientific Reports*, 8(1), 12975. <https://doi.org/10.1038/s41598-018-31266-z>
- 908 Voirin, B., Scriba, M. F., Martinez-Gonzalez, D., Vyssotski, A. L., Wikelski, M., & Rattenborg, N. C.  
909 (2014). Ecology and Neurophysiology of Sleep in Two Wild Sloth Species. *Sleep*, 37(4),  
910 753–761. <https://doi.org/10.5665/sleep.3584>
- 911 Vyazovskiy, V. V. (2015). Sleep, recovery, and metaregulation: Explaining the benefits of sleep.  
912 *Nature and Science of Sleep*, 7, 171–184. <https://doi.org/10.2147/NSS.S54036>

- 913 Ward, A., & Webster, M. (2016). *Sociality: The behaviour of group-living animals*.
- 914 Willems, E. P., & van Schaik, C. P. (2017). The social organization of *Homo ergaster*: Inferences  
915 from anti-predator responses in extant primates. *Journal of Human Evolution*, *109*, 11–21.  
916 <https://doi.org/10.1016/j.jhevol.2017.05.003>
- 917 Wood, S. N. (2011). Fast stable restricted maximum likelihood and marginal likelihood estimation of  
918 semiparametric generalized linear models. *Journal of the Royal Statistical Society: Series B*  
919 (*Statistical Methodology*), *73*(1), 3–36. <https://doi.org/10.1111/j.1467-9868.2010.00749.x>
- 920 Wrangham, R., & Carmody, R. (2010). Human adaptation to the control of fire. *Evolutionary*  
921 *Anthropology: Issues, News, and Reviews*, *19*(5), 187–199.  
922 <https://doi.org/10.1002/evan.20275>
- 923 Wright, A. J., Akamatsu, T., Mouritsen, K. N., Sveegaard, S., Dietz, R., & Teilmann, J. (2017). Silent  
924 porpoise: Potential sleeping behaviour identified in wild harbour porpoises. *Animal*  
925 *Behaviour*, *133*, 211–222. <https://doi.org/10.1016/j.anbehav.2017.09.015>
- 926 Yoder, J. M., Marschall, E. A., & Swanson, D. A. (2004). The cost of dispersal: Predation as a  
927 function of movement and site familiarity in ruffed grouse. *Behavioral Ecology*, *15*(3), 469–  
928 476.
- 929 Zhdanova, I. V., Geiger, D. A., Schwagerl, A. L., Leclair, O. U., Killiany, R., Taylor, J. A., Rosene,  
930 D. L., Moss, M. B., & Madras, B. K. (2002). Melatonin promotes sleep in three species of  
931 diurnal nonhuman primates. *Physiology & Behavior*, *75*(4), 523–529.  
932 [https://doi.org/10.1016/S0031-9384\(02\)00654-6](https://doi.org/10.1016/S0031-9384(02)00654-6)
- 933  
934  
935  
936  
937  
938  
939  
940  
941  
942

943 **Figures**

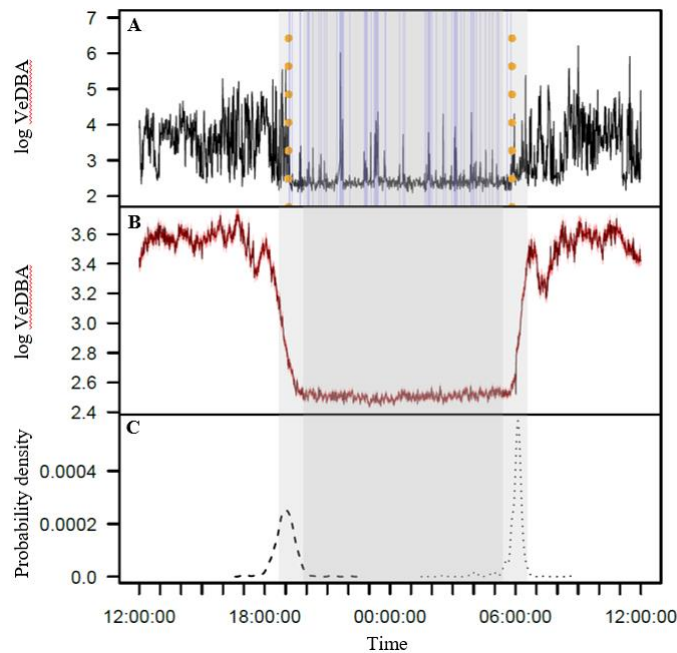

944

945 **Figure 1. Extracting activity and sleep from accelerometry in a group of wild olive baboons.** Adapting  
946 algorithms developed by van Hees and colleagues (2015, 2018), we used the vectorial dynamic body  
947 acceleration (VeDBA), a measure of overall activity, to determine the sleep onset and awakening times (A;  
948 orange dotted lines), as well as periods of wake after sleep onset (A; blue shading) for each individual baboon  
949 on each day. These metrics allowed us to calculate the total sleep time, sleep period duration, and sleep  
950 efficiency as well. The plot (A) shows the data of one individual within a single noon-to-noon period as an  
951 example. Averaged across all individuals on all nights ( $N = 354$  baboons-nights), the log VeDBA shows that  
952 baboons exhibit activity patterns typical of a diurnal animal with monophasic sleep (B), with a consolidated  
953 period of very low levels of activity during the night. Although the timing of waking (C; dotted line) was more  
954 consistent across the group and across the study period than the timing of sleep onset (C; dashed line), both  
955 sleep onset and waking typically occurred within astronomical twilight. The red shading in (B) indicates  $\pm 1$  SE.  
956 In all subplots, the grey shaded region depicts the period between sunset and sunrise, with double shading from  
957 the end of astronomical twilight to the beginning of morning astronomical twilight.

958

959

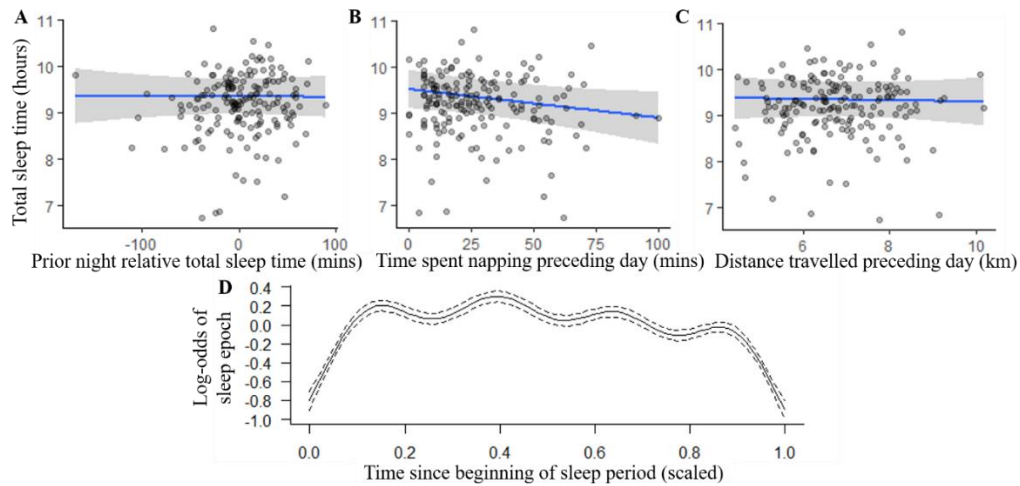

960

961

962

963

964

965

966

967

968

**Figure 2. Homeostatic regulation has a weak influence on baboon sleep patterns.** Neither the relative sleep time on the previous night (the difference between an individual's total sleep time and its average total sleep time; A) nor the distance travelled on the preceding day (C) influenced sleep duration, although baboons did sleep less following days with more napping (B). Additionally, the likelihood of a baboon being asleep did not substantially decrease as the night progressed and the baboon payed off its sleep debt (D). In (D), time since the beginning of the sleep period is scaled from 0 (beginning) to 1 (end of the sleep period). Subplots depict conditional effects of each variable from models of the data, with raw data points overlaid.

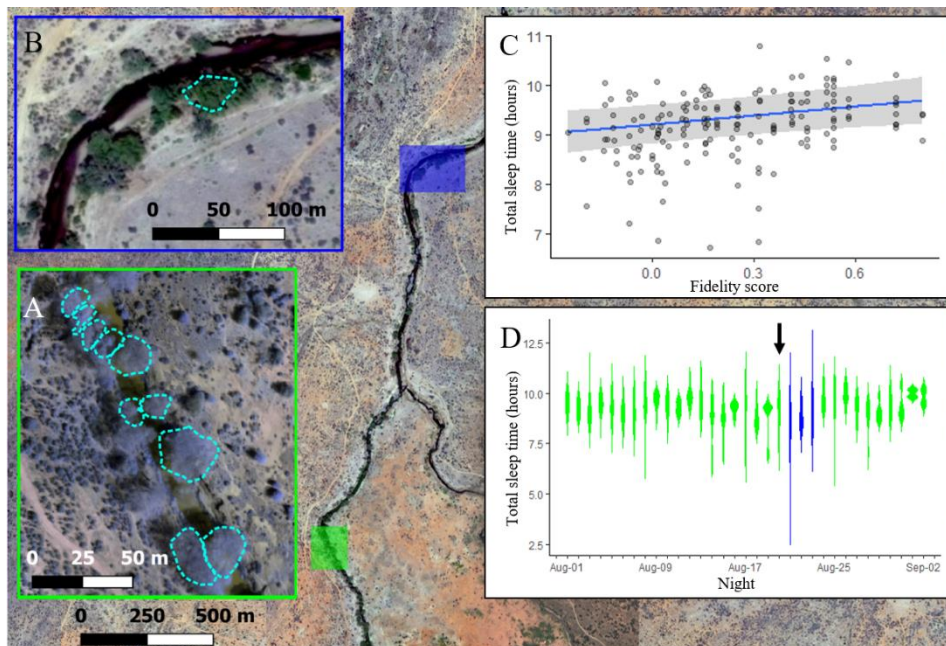

969

970

971

972

973

974

975

976

**Figure 3. The location where baboons sleep has consequences on sleep duration.** Group members spent the majority of the study (32/35 nights) sleeping in 10 yellow fever (*A. xanthophloea*) trees in a grove along the Ewaso Ng'iro river (A). Within this sleep site, baboons slept longer when sleeping in trees to which they showed high fidelity (C). At 20:30 on the 21<sup>st</sup> night of the study, a leopard mounted an unsuccessful attack on the group in their sleep site. The following day, the baboons moved to a new sleep site 1.5 km away from their main sleep site (B). Baboons slept substantially less following this change in sleep site, but this effect did not persist beyond the first night in the new location (D). (C) depicts the conditional effects from models of the data,

977 with raw data points overlaid, and (D) depicts a violin plot of the data, with color corresponding to the sleep site  
978 (A and B). The arrow in (D) indicates the night on which a leopard launched a failed attack on the group.  
979  
980

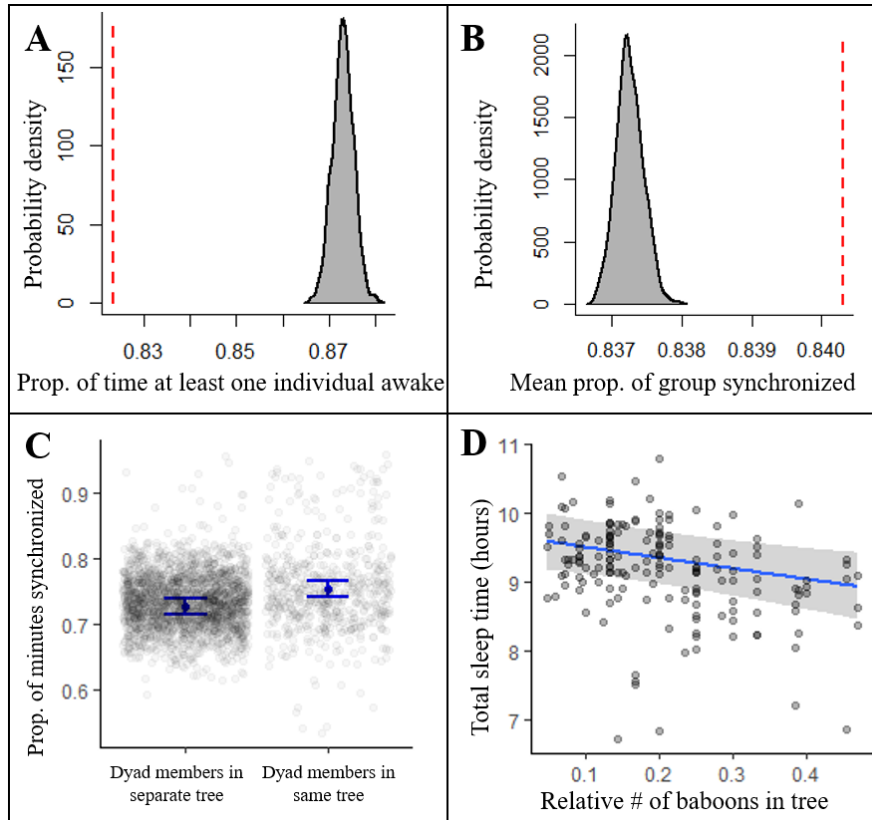

981  
982 **Figure 4. Collective dynamics within the sleep site influence sleep patterns.** Group-mates' periods of  
983 nocturnal wakefulness were not staggered, but rather synchronized, as indicated by a significantly lower  
984 proportion of time with at least one individual awake (A, dotted red line; Fisher's exact test:  $p < 0.0001$ ) and a  
985 significantly greater proportion of the group exhibiting synchronized behaviors (B, dotted red line; Fisher's  
986 exact test:  $p < 0.0001$ ) than expected based on 1000 time-shifted data sets (gray distribution). Synchronized  
987 sleep patterns likely result from individuals waking in response to the nighttime activity of nearby group-mates,  
988 as dyads show greater synchronization when dyad members sleep in the same tree compared to when they sleep  
989 in different trees (C). As a consequence of these local social perturbations, baboons sleep less when sleeping in  
990 trees with more group-mates (D). Subplots (C) and (D) depict the conditional effects from models of the data,  
991 with raw data points overlaid.

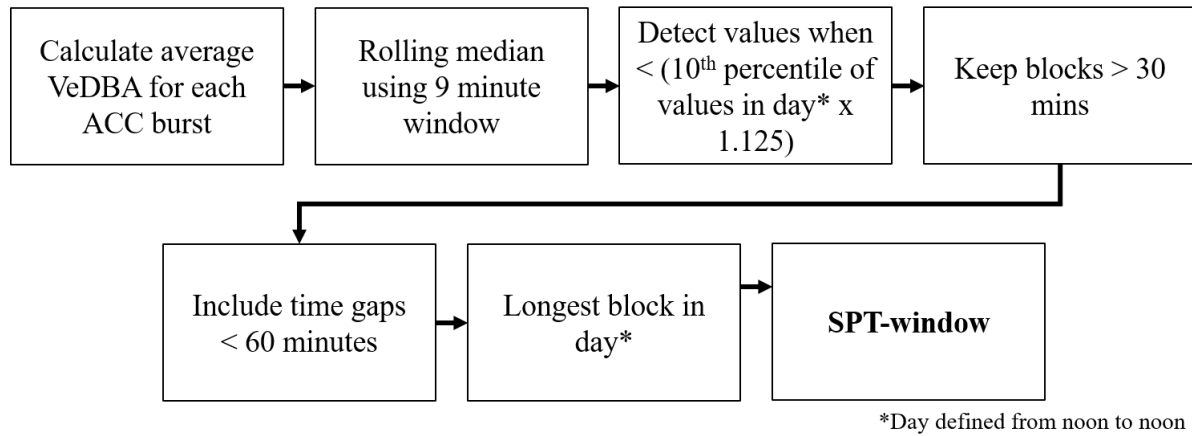

992

993 **Figure 5.** SPT-window detection algorithm adapted from van Hees et al., 2018.

994

995

996 **Supplemental Information**

997

| Collar # | GPS start date | GPS end date | ACC start date | ACC end date |
|----------|----------------|--------------|----------------|--------------|
| 2426     | 2012-08-01     | 2012-08-30   | 2012-08-01     | 2012-08-31   |
| 2427     | 2012-08-01     | 2012-09-04   | 2012-08-01     | 2012-09-04   |
| 2428     | 2012-08-01     | 2012-08-15   | 2012-08-01     | 2012-08-15   |
| 2430     | 2012-08-01     | 2012-08-03   | 2012-08-01     | 2012-08-03   |
| 2432     | 2012-08-01     | 2012-08-05   | 2012-08-01     | 2012-08-05   |
| 2433     | 2012-08-01     | 2012-08-06   | 2012-08-01     | 2012-08-06   |
| 2434     | 2012-08-01     | 2012-08-02   | 2012-08-01     | 2012-08-02   |
| 2436     | 2012-08-01     | 2012-09-02   | 2012-08-01     | 2012-09-02   |
| 2439     | 2012-08-01     | 2012-09-04   | 2012-08-01     | 2012-09-04   |
| 2441     | 2012-08-01     | 2012-08-29   | 2012-08-01     | 2012-08-29   |
| 2443     | 2012-08-01     | 2012-09-02   | 2012-08-01     | 2012-09-02   |
| 2446     | 2012-08-01     | 2012-09-02   | 2012-08-01     | 2012-09-02   |
| 2447     | 2012-08-01     | 2012-08-31   | 2012-08-01     | 2012-08-31   |
| 2448     | 2012-08-01     | 2012-08-16   | 2012-08-01     | 2012-08-17   |
| 2449     | 2012-08-01     | 2012-08-31   | 2012-08-01     | 2012-08-31   |
| 2450     | 2012-08-01     | 2012-08-05   | 2012-08-01     | 2012-08-05   |
| 2451     | 2012-08-01     | 2012-09-02   | 2012-08-01     | 2012-09-02   |
| 2452     | 2012-08-01     | 2012-08-14   | 2012-08-01     | 2012-08-14   |
| 2453     | 2012-08-01     | 2012-08-03   | 2012-08-01     | 2012-08-03   |
| 2454     | 2012-08-01     | 2012-08-14   | 2012-08-01     | 2012-08-14   |
| 2455     | 2012-08-01     | 2012-08-08   | 2012-08-01     | 2012-08-08   |
| 2456     | 2012-08-01     | 2012-08-31   | 2012-08-01     | 2012-08-31   |
| 2457     | 2012-08-01     | 2012-09-04   | 2012-08-01     | 2012-09-04   |
| 2458     | 2012-08-01     | 2012-08-01   | 2012-08-01     | 2012-08-01   |
| 2459     | 2012-08-01     | 2012-08-01   | 2012-08-01     | 2012-08-01   |
| 2460     | 2012-08-01     | 2012-08-01   | 2012-08-01     | 2012-08-01   |

998

999

**Table S1.** Collar metadata. Table depicts the data on which each collar began collecting data and ceased to collected data for both GPS and accelerometry (ACC).



1000

|                       | Total sleep time | Sleep onset time | Waking time | Sleep period duration | Sleep efficiency |
|-----------------------|------------------|------------------|-------------|-----------------------|------------------|
| Total sleep time      | 1                | -0.61            | 0.65        | 0.87                  | 0.57             |
| Sleep onset time      | x                | 1                | -0.04       | -0.72                 | -0.05            |
| Waking time           | x                | x                | 1           | 0.72                  | 0.10             |
| Sleep period duration | x                | x                | x           | 1                     | 0.11             |
| Sleep efficiency      | x                | x                | x           | x                     | 1                |

1001 **Table S2.** Pearson correlation coefficient between the metrics of sleep extracted from the  
 1002 accelerometry data. Total sleep time is correlated with all sleep metrics.  
 1003

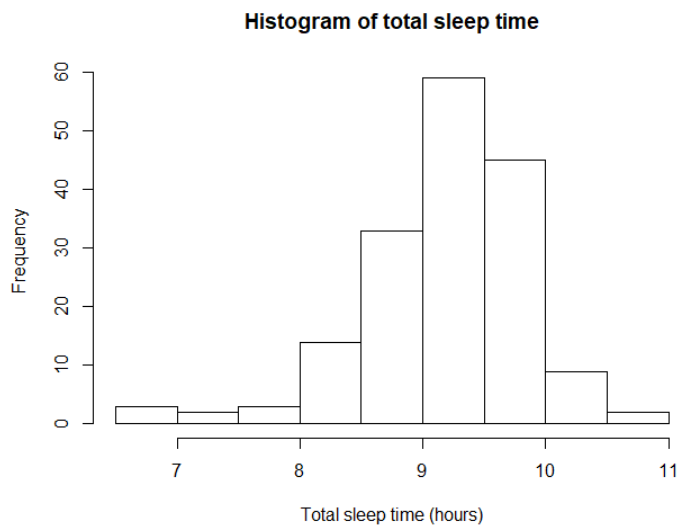

1004  
 1005  
 1006  
 1007

**Figure S1.** Histogram of total sleep time for the first 20 nights of the study (data prior to leopard attack)

| <b>Total sleep time (Standardized)</b>    |                  |                 |
|-------------------------------------------|------------------|-----------------|
| <i>Predictors</i>                         | <i>Estimates</i> | <i>CI (95%)</i> |
| <b>Intercept</b>                          | -0.03            | -0.55 – 0.49    |
| <b>Travel distance</b>                    | -0.02            | -0.18 – 0.15    |
| <b>Time spent napping</b>                 | -0.18            | -0.36 – -0.01   |
| <b>Previous night total sleep time</b>    | -0.00            | -0.14 – 0.13    |
| <b>Tree fidelity score</b>                | 0.20             | 0.05 – 0.36     |
| <b>Relative number of baboons in tree</b> | -0.51            | -0.85 – -0.16   |
| <b>Minimum ambient temperature</b>        | -0.03            | -0.21 – 0.13    |
| <b>Moon phase</b>                         | 0.05             | -0.12 – 0.22    |
| <b>age: Juvenile</b>                      | -0.32            | -1.12 – 0.50    |
| <b>age: Subadult</b>                      | -0.32            | -0.80 – 0.14    |
| <b>sex: Male</b>                          | 0.44             | -0.04 – 0.92    |
| <b>tree: tree2</b>                        | -0.26            | -1.08 – 0.56    |
| <b>tree: tree3</b>                        | -0.15            | -1.01 – 0.69    |
| <b>tree: tree4</b>                        | -0.81            | -1.30 – -0.32   |

|                                                           |               |              |
|-----------------------------------------------------------|---------------|--------------|
| <b>tree: tree5</b>                                        | -0.24         | -0.74 – 0.27 |
| <b>tree: tree6</b>                                        | 0.02          | -0.60 – 0.65 |
| <b>tree: tree7</b>                                        | 0.10          | -0.62 – 0.84 |
| <b>tree: tree8</b>                                        | -0.26         | -0.75 – 0.22 |
| <b>tree: tree10</b>                                       | -0.22         | -0.95 – 0.51 |
| <b>tree: tree11</b>                                       | -0.22         | -0.78 – 0.32 |
| <b>Random Effects</b>                                     |               |              |
| $\sigma^2$                                                | 0.53          |              |
| $\tau_{00}$ night                                         | 0.02          |              |
| $\tau_{00}$ tag                                           | 0.08          |              |
| <b>ICC</b>                                                | 0.16          |              |
| $N_{tag}$                                                 | 18            |              |
| $N_{night}$                                               | 18            |              |
| <b>Observations</b>                                       | 170           |              |
| <b>Marginal R<sup>2</sup> / Conditional R<sup>2</sup></b> | 0.340 / 0.414 |              |

1008 **Table S3.** Model output table of model total sleep time (for the first 20 days) with all numerical  
 1009 variables standardized

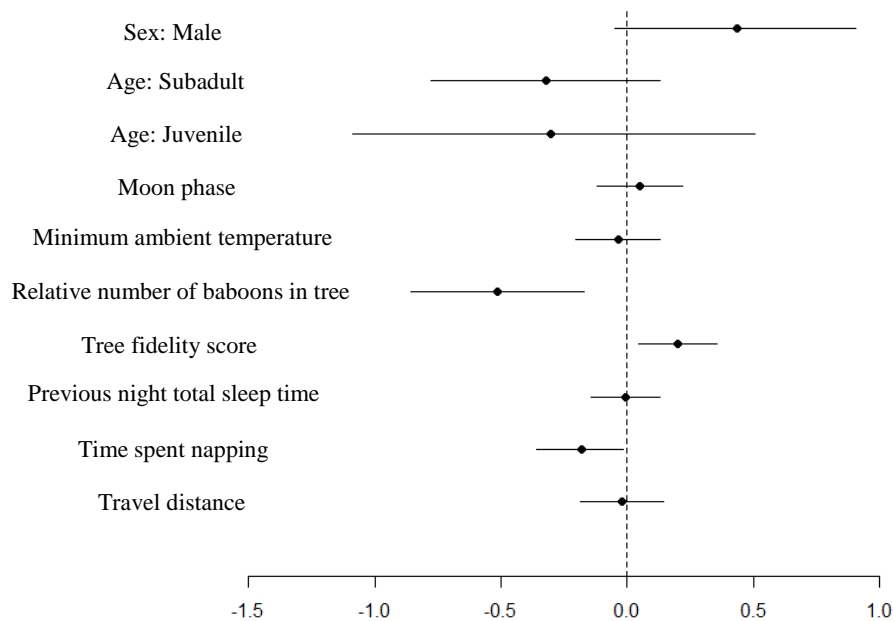

1010 **Figure S2.** Model output plot of model of total sleep time (for the first 20 days) with all numerical  
 1011 variables standardized. The categorical variable tree is not plotted  
 1012  
 1013

| <b>Total sleep time (hours)</b>                        |                  |                 |
|--------------------------------------------------------|------------------|-----------------|
| <i>Predictors</i>                                      | <i>Estimates</i> | <i>CI (95%)</i> |
| <b>Intercept</b>                                       | 18.65            | -24.20 – 63.97  |
| <b>Travel distance (km)</b>                            | -0.01            | -0.12 – 0.09    |
| <b>Time spent napping (mins)</b>                       | -0.01            | -0.01 – -0.00   |
| <b>Previous night relative total sleep time (mins)</b> | -0.00            | -0.00 – 0.00    |
| <b>Tree fidelity score</b>                             | 0.60             | 0.15 – 1.03     |
| <b>Relative number of baboons in tree</b>              | -1.55            | -2.58 – -0.48   |

|                                                                 |               |               |
|-----------------------------------------------------------------|---------------|---------------|
| <b>Minimum ambient temperature (degree Celsius)</b>             | -0.03         | -0.19 – 0.12  |
| <b>Moon phase</b>                                               | 0.11          | -0.25 – 0.48  |
| <b>age: Juvenile</b>                                            | -0.26         | -0.85 – 0.38  |
| <b>age: Subadult</b>                                            | -0.25         | -0.60 – 0.10  |
| <b>sex: Male</b>                                                | 0.34          | -0.03 – 0.72  |
| <b>tree: tree2</b>                                              | -0.20         | -0.84 – 0.44  |
| <b>tree: tree3</b>                                              | -0.12         | -0.79 – 0.55  |
| <b>tree: tree4</b>                                              | -0.64         | -1.03 – -0.25 |
| <b>tree: tree5</b>                                              | -0.20         | -0.59 – 0.19  |
| <b>tree: tree6</b>                                              | 0.02          | -0.48 – 0.50  |
| <b>tree: tree7</b>                                              | 0.09          | -0.46 – 0.64  |
| <b>tree: tree8</b>                                              | -0.22         | -0.59 – 0.16  |
| <b>tree: tree10</b>                                             | -0.17         | -0.74 – 0.38  |
| <b>tree: tree11</b>                                             | -0.18         | -0.60 – 0.24  |
| <b>Random Effects</b>                                           |               |               |
| $\sigma^2$                                                      | 0.31          |               |
| $\tau_{00}$ night                                               | 0.01          |               |
| $\tau_{00}$ tag                                                 | 0.05          |               |
| <b>ICC</b>                                                      | 0.17          |               |
| $N_{\text{tag}}$                                                | 18            |               |
| $N_{\text{night}}$                                              | 18            |               |
| <b>Observations</b>                                             | 170           |               |
| <b>Marginal <math>R^2</math> / Conditional <math>R^2</math></b> | 0.337 / 0.412 |               |

1014 **Table S4.** Model output table of model total sleep time (for the first 20 days) with no standardization  
 1015 of variables  
 1016

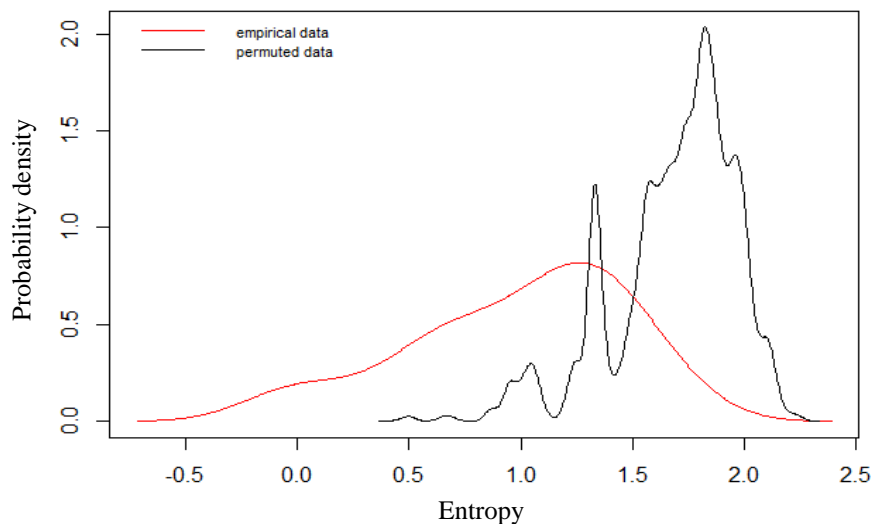

1017 **Figure S3.** Comparison of the Shannon entropies of individuals' sleep tree occupancy within this  
 1018 sleep site to a null distribution produced by 1000 identity permutations. The analysis revealed lower  
 1019 entropy in tree occupancy than expected by random chance (one-tailed two-sample Kolmogorov-  
 1020 Smirnov test:  $p < 1.0 \times 10^{-9}$ ), indicating that individuals exhibited high fidelity to particular trees. The  
 1021 red line represents the distribution of Shannon entropies of individuals' sleep tree occupancy  
 1022 calculated from the empirical data, and the black line represents the distribution of entropy of sleep  
 1023 tree occupancy derived from the permuted data set.  
 1024  
 1025  
 1026

1027

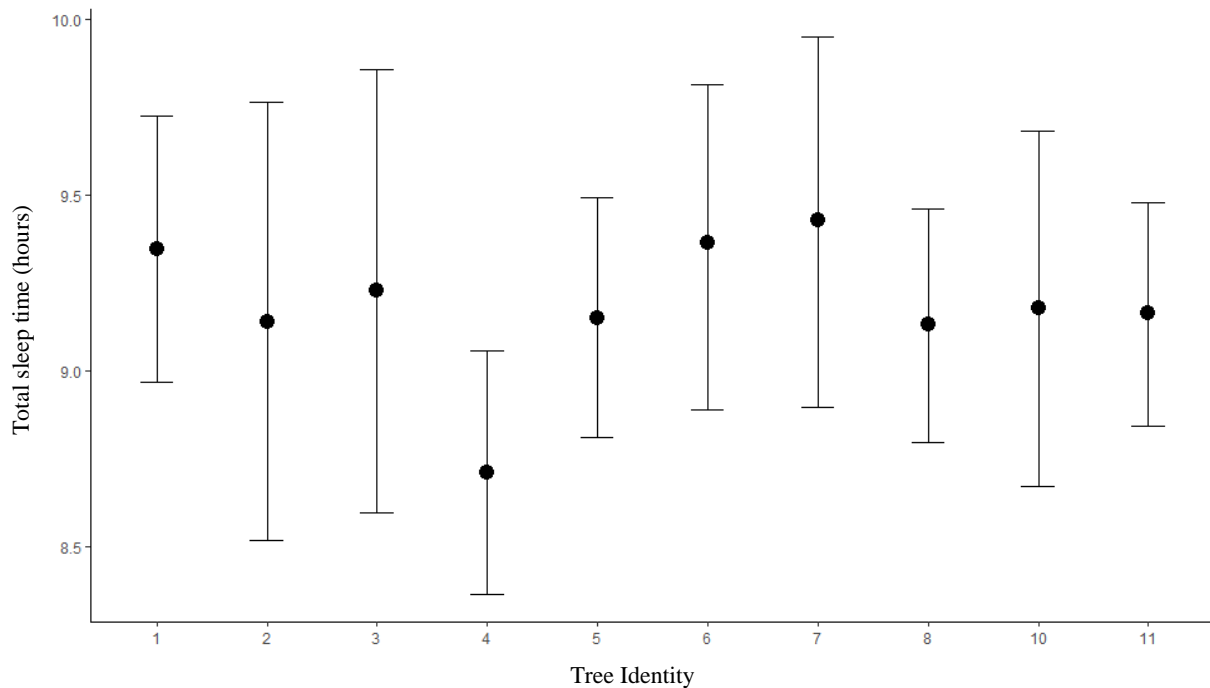

1028

1029

1030

1031

1032

**Figure S4.** The conditional effect of tree identity on total sleep time. The conditional effects plotted here are from the unstandardized Bayesian linear mixed model (LMM) of total sleep time (hours).

| <b>Total sleep time (Standardized)</b>    |                  |                 |
|-------------------------------------------|------------------|-----------------|
| <i>Predictors</i>                         | <i>Estimates</i> | <i>CI (95%)</i> |
| <b>Intercept</b>                          | -0.04            | -0.55 – 0.47    |
| <b>Average VeDBA during day</b>           | -0.12            | -0.33 – 0.12    |
| <b>Time spent napping</b>                 | -0.13            | -0.30 – 0.05    |
| <b>Previous night total sleep time</b>    | -0.00            | -0.14 – 0.13    |
| <b>Tree fidelity score</b>                | 0.20             | 0.04 – 0.36     |
| <b>Relative number of baboons in tree</b> | -0.55            | -0.89 – -0.20   |
| <b>Minimum ambient temperature</b>        | -0.04            | -0.21 – 0.12    |
| <b>Moon phase</b>                         | 0.07             | -0.09 – 0.23    |
| <b>age: Juvenile</b>                      | -0.21            | -1.01 – 0.59    |
| <b>age: Subadult</b>                      | -0.26            | -0.77 – 0.22    |
| <b>sex: Male</b>                          | 0.53             | 0.09 – 0.97     |
| <b>tree: tree2</b>                        | -0.34            | -1.18 – 0.49    |
| <b>tree: tree3</b>                        | -0.47            | -1.26 – 0.33    |
| <b>tree: tree4</b>                        | -0.86            | -1.37 – -0.35   |
| <b>tree: tree5</b>                        | -0.28            | -0.79 – 0.22    |
| <b>tree: tree6</b>                        | 0.04             | -0.60 – 0.68    |
| <b>tree: tree7</b>                        | 0.08             | -0.66 – 0.83    |
| <b>tree: tree8</b>                        | -0.28            | -0.77 – 0.23    |
| <b>tree: tree10</b>                       | -0.13            | -0.84 – 0.58    |
| <b>tree: tree11</b>                       | -0.24            | -0.79 – 0.31    |
| <b>Random Effects</b>                     |                  |                 |
| $\sigma^2$                                | 0.55             |                 |
| $\tau_{00}$ night                         | 0.02             |                 |
| $\tau_{00}$ tag                           | 0.07             |                 |

|                                                           |               |
|-----------------------------------------------------------|---------------|
| <b>ICC</b>                                                | 0.13          |
| <b>N<sub>tag</sub></b>                                    | 18            |
| <b>N<sub>night</sub></b>                                  | 18            |
| <b>Observations</b>                                       | 178           |
| <b>Marginal R<sup>2</sup> / Conditional R<sup>2</sup></b> | 0.352 / 0.416 |

1033 **Table S5.** Model output table of model total sleep time (for the first 20 days) with all numerical  
 1034 variables standardized  
 1035

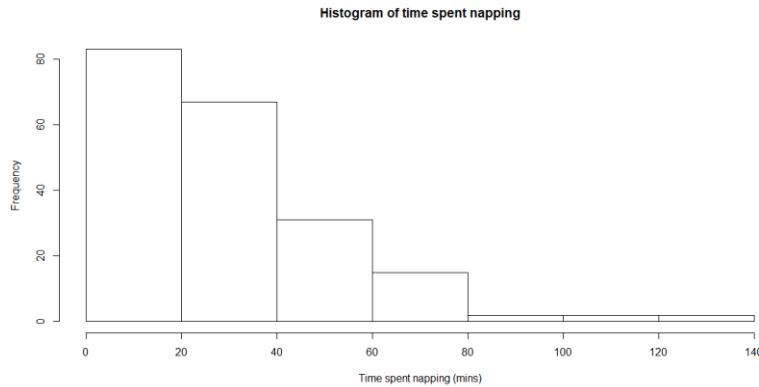

1036 **Figure S5.** Histogram of time spent napping for the first 20 days of the study (data prior to leopard  
 1037 attack)  
 1038  
 1039

| <b>Time spent napping (standardized)</b>                  |                  |                 |
|-----------------------------------------------------------|------------------|-----------------|
| <i>Predictors</i>                                         | <i>Estimates</i> | <i>CI (95%)</i> |
| <b>Intercept</b>                                          | -0.10            | -0.49 – 0.28    |
| <b>Prior night total sleep time</b>                       | 0.05             | -0.08 – 0.18    |
| <b>Random Effects</b>                                     |                  |                 |
| <b>σ<sup>2</sup></b>                                      | 0.41             |                 |
| <b>τ<sub>00</sub> night</b>                               | 0.12             |                 |
| <b>τ<sub>00</sub> tag</b>                                 | 0.51             |                 |
| <b>ICC</b>                                                | 0.60             |                 |
| <b>N<sub>tag</sub></b>                                    | 20               |                 |
| <b>N<sub>night</sub></b>                                  | 19               |                 |
| <b>Observations</b>                                       | 199              |                 |
| <b>Marginal R<sup>2</sup> / Conditional R<sup>2</sup></b> | 0.003 / 0.617    |                 |

1040 **Table S6.** Model output table of model of time spent napping during the day (for the first 20 days)  
 1041 with all numerical variables standardized  
 1042

| <b>Time spent napping (minutes)</b>         |                  |                 |
|---------------------------------------------|------------------|-----------------|
| <i>Predictors</i>                           | <i>Estimates</i> | <i>CI (95%)</i> |
| <b>Intercept</b>                            | 21.22            | -5.83 – 47.59   |
| <b>Prior night total sleep time (hours)</b> | 1.53             | -1.23 – 4.42    |
| <b>Random Effects</b>                       |                  |                 |
| <b>σ<sup>2</sup></b>                        | 295.93           |                 |
| <b>τ<sub>00</sub> night</b>                 | 25.86            |                 |
| <b>τ<sub>00</sub> tag</b>                   | 99.07            |                 |
| <b>ICC</b>                                  | 0.30             |                 |
| <b>N<sub>tag</sub></b>                      | 20               |                 |
| <b>N<sub>night</sub></b>                    | 19               |                 |

|                                                           |               |
|-----------------------------------------------------------|---------------|
| <b>Observations</b>                                       | 199           |
| <b>Marginal R<sup>2</sup> / Conditional R<sup>2</sup></b> | 0.002 / 0.521 |

1043 **Table S7.** Model output table of model of time spent napping during the day (for the first 20 days)  
 1044 without standardization of the variables  
 1045

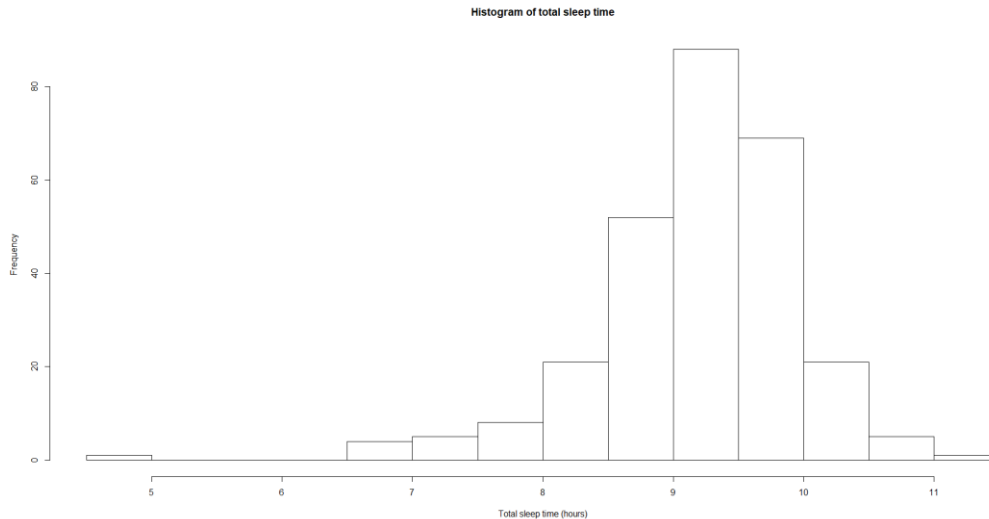

1046 **Figure S6.** Histogram of total sleep time for the entire study duration  
 1047  
 1048  
 1049

| <b>Total sleep time (standardized)</b>                          |                  |                 |
|-----------------------------------------------------------------|------------------|-----------------|
| <i>Predictors</i>                                               | <i>Estimates</i> | <i>CI (95%)</i> |
| <b>Intercept</b>                                                | -0.24            | -0.57 – 0.11    |
| <b>cond_night: night of leopard attack</b>                      | -0.25            | -0.87 – 0.39    |
| <b>cond_night: first night in new sleep site</b>                | -1.55            | -2.18 – -0.91   |
| <b>cond_night: second night in new sleep site</b>               | -0.26            | -0.98 – 0.44    |
| <b>cond_night: third night in new sleep site</b>                | 0.21             | -0.47 – 0.88    |
| <b>cond_night: remainder of nights (in original sleep site)</b> | 0.25             | -0.07 – 0.56    |
| <b>age: Juvenile</b>                                            | -0.27            | -1.14 – 0.59    |
| <b>age: Subadult</b>                                            | -0.36            | -0.87 – 0.13    |
| <b>sex: Male</b>                                                | 0.74             | 0.25 – 1.26     |
| <b>Travel distance</b>                                          | -0.06            | -0.18 – 0.07    |
| <b>Time spent napping</b>                                       | -0.11            | -0.28 – 0.05    |
| <b>Previous night relative total sleep time</b>                 | 0.15             | 0.04 – 0.27     |
| <b>Minimum ambient temperature</b>                              | -0.00            | -0.14 – 0.14    |
| <b>Moon phase</b>                                               | 0.02             | -0.12 – 0.15    |
| <b>Random Effects</b>                                           |                  |                 |
| $\sigma^2$                                                      | 0.78             |                 |
| $\tau_{00}$ tag                                                 | 0.14             |                 |
| ICC                                                             | 0.16             |                 |
| $N$ tag                                                         | 20               |                 |
| <b>Observations</b>                                             | 275              |                 |
| <b>Marginal R<sup>2</sup> / Conditional R<sup>2</sup></b>       | 0.251 / 0.314    |                 |

1050 **Table S8.** Model output table of model of total sleep time using data from entire study duration  
 1051 (including after the leopard attack) with all variables standardized  
 1052

**Total sleep time (hours)**

| <i>Predictors</i>                                               | <i>Estimates</i> | <i>CI (95%)</i> |
|-----------------------------------------------------------------|------------------|-----------------|
| <b>Intercept</b>                                                | 8.43             | -43.81 – 59.58  |
| <b>cond_night: night of leopard attack</b>                      | -0.21            | -0.90 – 0.48    |
| <b>cond_night: first night in new sleep site</b>                | -1.19            | -1.88 – -0.49   |
| <b>cond_night: second night in new sleep site</b>               | -0.23            | -0.98 – 0.48    |
| <b>cond_night: third night in new sleep site</b>                | 0.15             | -0.58 – 0.86    |
| <b>cond_night: remainder of nights (in original sleep site)</b> | 0.15             | -0.19 – 0.48    |
| <b>age: Juvenile</b>                                            | -0.28            | -0.96 – 0.39    |
| <b>age: Subadult</b>                                            | -0.31            | -0.71 – 0.07    |
| <b>sex: Male</b>                                                | 0.58             | 0.19 – 0.99     |
| <b>Travel distance</b>                                          | -0.04            | -0.13 – 0.05    |
| <b>Time spent napping</b>                                       | -0.00            | -0.01 – 0.00    |
| <b>Previous night relative total sleep time</b>                 | 0.00             | 0.00 – 0.00     |
| <b>Minimum ambient temperature</b>                              | 0.00             | -0.17 – 0.19    |
| <b>Moon phase</b>                                               | 0.07             | -0.33 – 0.47    |
| <b>Random Effects</b>                                           |                  |                 |
| $\sigma^2$                                                      | 0.43             |                 |
| $\tau_{00}$ night                                               | 0.05             |                 |
| $\tau_{00}$ tag                                                 | 0.09             |                 |
| <b>ICC</b>                                                      | 0.25             |                 |
| $N_{tag}$                                                       | 20               |                 |
| $N_{night}$                                                     | 32               |                 |
| <b>Observations</b>                                             | 275              |                 |
| <b>Marginal <math>R^2</math> / Conditional <math>R^2</math></b> | 0.257 / 0.365    |                 |

1053 **Table S9.** Model output table of model of total sleep time using data from entire study duration  
 1054 (including after the leopard attack) without standardization of variables  
 1055

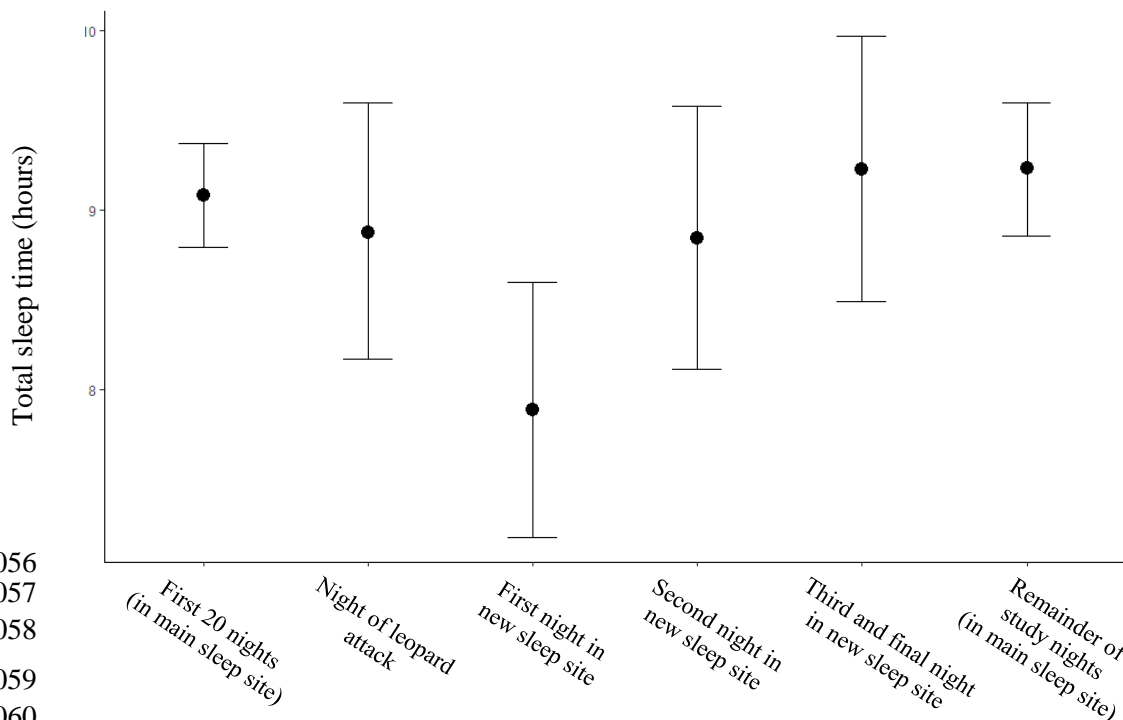

1056 **Figure S7.** The conditional effect of night condition on total sleep time. The conditional effects  
 1057 presented here are from the unstandardized model of total sleep time.  
 1058  
 1059  
 1060  
 1061  
 1062  
 1063

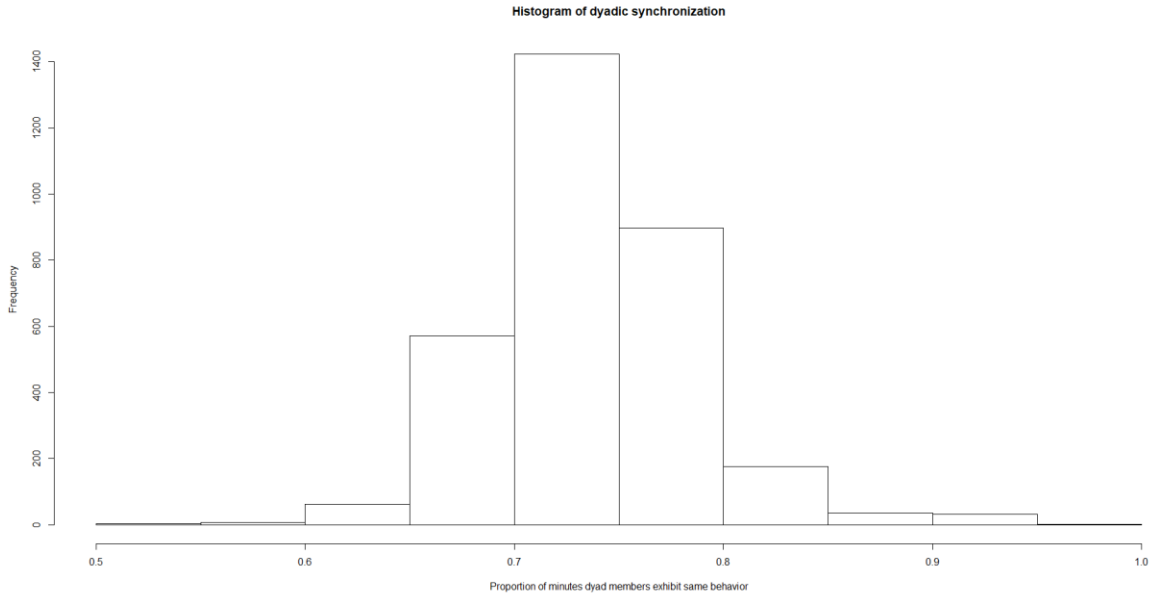

1064  
1065  
1066  
1067  
1068

**Figure S8.** Histogram of the dyadic synchronization scores, which indicates the proportions of minutes between 21:00 and 05:00 during which both members of a dyad exhibited the same behavior (either sleep or wakefulness) on a given night.

| Proportion of minutes synchronized (Standardized)    |               |              |
|------------------------------------------------------|---------------|--------------|
| Predictors                                           | Estimates     | CI (95%)     |
| Intercept                                            | -0.21         | -0.45 – 0.03 |
| Occupying same tree                                  | 0.56          | 0.47 – 0.64  |
| <b>Random Effects</b>                                |               |              |
| $\sigma^2$                                           | 0.60          |              |
| $\tau_{00}$ dy_name                                  | 0.14          |              |
| $\tau_{00}$ night                                    | 0.19          |              |
| $\tau_{00}$ tag1                                     | 0.08          |              |
| $\tau_{00}$ tag2                                     | 0.09          |              |
| ICC                                                  | 0.45          |              |
| N night                                              | 34            |              |
| N tag1                                               | 22            |              |
| N tag2                                               | 22            |              |
| N dy_name                                            | 250           |              |
| Observations                                         | 2997          |              |
| Marginal R <sup>2</sup> / Conditional R <sup>2</sup> | 0.050 / 0.404 |              |

1069  
1070  
1071  
1072

**Table S10.** Model output table of model of synchronization (i.e. the proportion of minutes during a night that both dyad members exhibit the same behavior, either sleep or wakefulness) with response variable standardized of the response variable

| Proportion of minutes synchronized |           |             |
|------------------------------------|-----------|-------------|
| Predictors                         | Estimates | CI (95%)    |
| Intercept                          | 0.73      | 0.71 – 0.74 |
| Occupying same tree                | 0.03      | 0.02 – 0.03 |
| <b>Random Effects</b>              |           |             |
| $\sigma^2$                         | 0.00      |             |
| $\tau_{00}$ dy_name                | 0.00      |             |
| $\tau_{00}$ night                  | 0.00      |             |



|                                                           |               |
|-----------------------------------------------------------|---------------|
| <b>T00 tag1</b>                                           | 0.00          |
| <b>T00 tag2</b>                                           | 0.00          |
| <b>ICC</b>                                                | 0.45          |
| <b>N<sub>night</sub></b>                                  | 34            |
| <b>N<sub>tag1</sub></b>                                   | 22            |
| <b>N<sub>tag2</sub></b>                                   | 22            |
| <b>N<sub>dy_name</sub></b>                                | 250           |
| <b>Observations</b>                                       | 2997          |
| <b>Marginal R<sup>2</sup> / Conditional R<sup>2</sup></b> | 0.050 / 0.404 |

1073 **Table S11.** Model output table of model of synchronization (i.e. the proportion of minutes during a  
 1074 night that both dyad members exhibit the same behavior, either sleep or wakefulness) without  
 1075 standardization of the response variable  
 1076

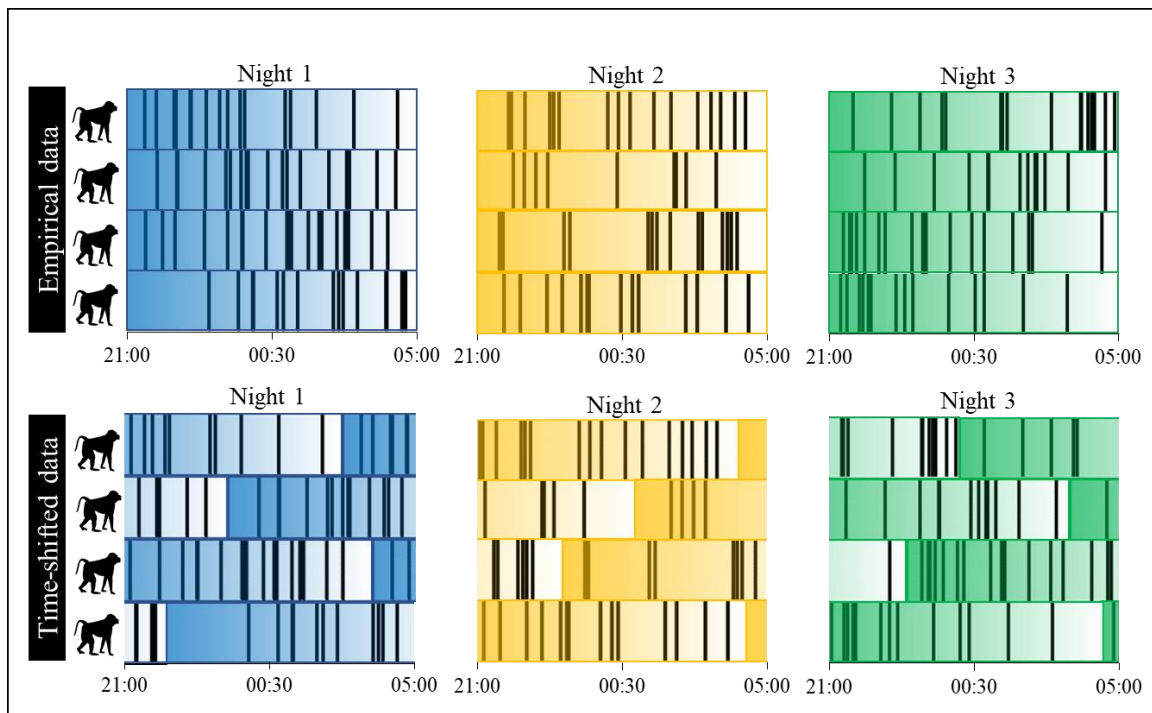

1077  
 1078 **Figure S9.** A toy example of the procedure we used to test for sentinel behavior and synchronization  
 1079 of nighttime behavior. Each row represents a baboon's time-series of sleep and wake activity during  
 1080 the night, with black vertical lines indicating periods of nocturnal waking behavior. Colors correspond  
 1081 to different nights, and the transparency of the color indicates the timing of night, with reference to  
 1082 the empirical, unshifted data. The time shifting procedure was repeated 1000 times to generate a null  
 1083 distribution for the proportion of minutes in which at least one individual is awake during the night  
 1084 and the mean proportion of the group exhibiting synchronized behavior.

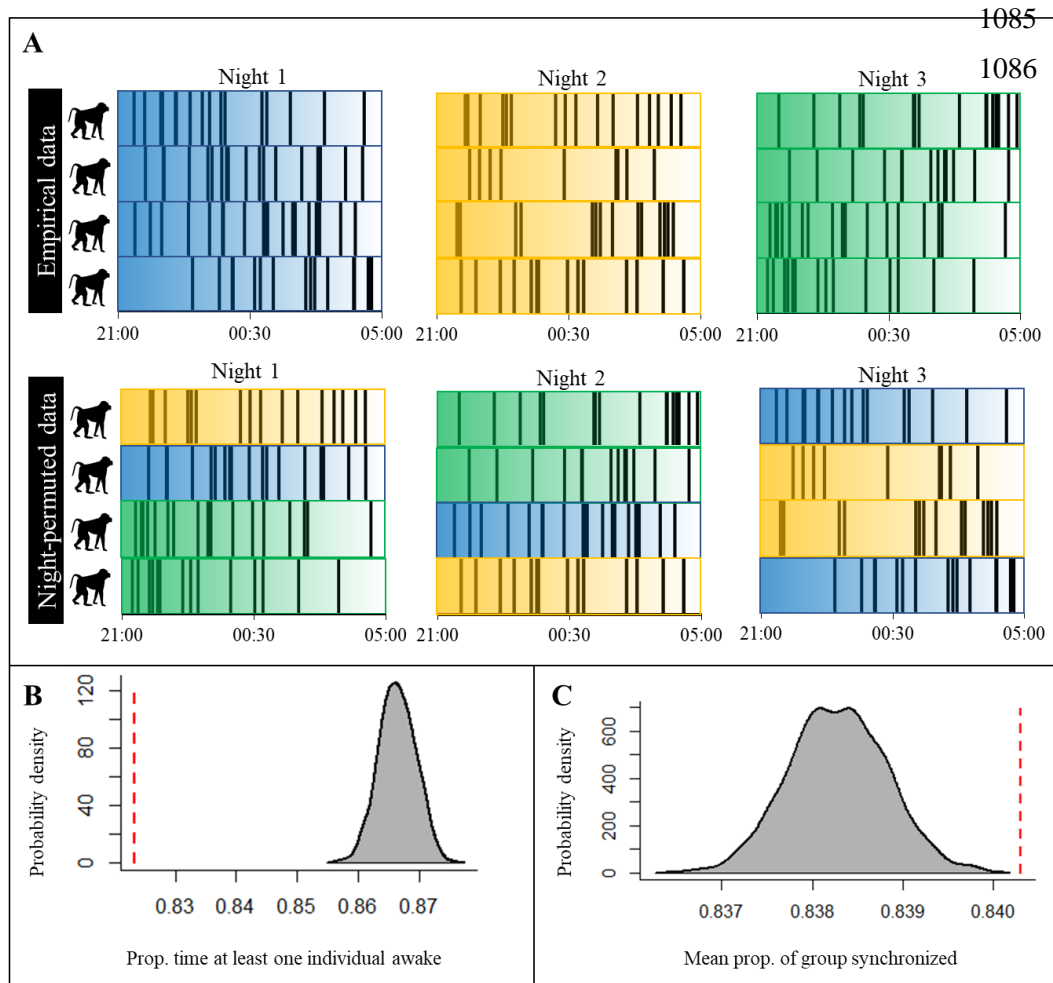

1087 **Figure S10.** A) A toy example of the procedure alternative to the one presented in the main text (and  
 1088 represented in Figure S9) that we used to confirm findings concerning sentinel behavior and  
 1089 synchronization of nighttime behavior that we derived from the procedure presented in the main text.  
 1090 Each row represents a baboon's time-series of sleep and wake activity during the night, with black  
 1091 vertical lines indicating periods of nocturnal waking behavior. Colors correspond to different nights,  
 1092 with reference to the empirical, unpermuted data, and the transparency of the color indicates the  
 1093 timing of night. The night permutation procedure was repeated 1000 times to generate a null  
 1094 distribution for the proportion of minutes in which at least one individual is awake during the night  
 1095 and the mean proportion of the group exhibiting synchronized behavior. B) Comparison of the  
 1096 empirical proportion of minutes in which at least one individual is awake (red dotted line) to its null  
 1097 distribution (grey density plot;  $p < 0.0001$ ). C) Comparison of the empirical mean of the proportion of  
 1098 the group exhibiting synchronized behavior (red dotted line) to its null distribution (grey density plot;  
 1099  $p < 0.0001$ ). This method of permutation controls for the possibility that baboons are synchronized in  
 1100 their behavior simply as a result of species-typical nocturnal waking patterns that are consistent across  
 1101 baboons and across nights.

1102  
 1103 *Sleep validation study*

1105 To evaluate whether the accelerometer-based sleep classification technique was accurately  
 1106 monitoring sleep in baboons, we returned to Mpala Research Centre in July 2019 to perform a  
 1107 validation study in which we compared the results of the accelerometer-based sleep classification to  
 1108 direct observations of awake and sleeping baboons. Using the procedures described in Strandburg-  
 1109 Peshkin et al., 2015, we trapped and anesthetized 27 members of a group of habituated olive baboons,  
 1110 fitting each with a GPS and accelerometry collar. Eleven of the 27 collars deployed recorded  
 1111 continuous tri-axial accelerations at 12 Hz/axis from 06:30 to 18:00 and 0.71-second bursts of

1112 accelerations at 56.2 Hz/axis at the beginning of every minute from 18:00 to 06:30. Accelerometry  
1113 data was collected by each of these 11 collars for up to 31 days. The remaining 16 collars did not  
1114 collect accelerometry data from 06:30 to 18:00, and thus we excluded data from these collars from the  
1115 validation study.

1116 We down-sampled and interpolated the accelerometry data such that it matched the sampling  
1117 frequency and schedule of the data collected in 2012 (i.e. the data analyzed for this manuscript). We  
1118 then applied the sleep classification algorithm described in the Materials and Methods to this  
1119 validation dataset.

1120 To validate the sleep classification algorithm, we performed direct behavioral observations of  
1121 the baboons at their primary sleep site. We recorded the behavior of the study baboons starting when  
1122 they approached their sleep site using a FLIR T1020 high-resolution infrared camera (FLIR Systems  
1123 Inc., Wilsonville, OR, USA). Recordings continued into the night for as long as the camera battery  
1124 allowed (average recording duration (range of recording durations): 7.4 hours (1.7 – 14.9 hours)), and  
1125 we collected thermal imaging data on 21 nights. We identified individuals in the thermal imagery both  
1126 in real-time, via observer narration of the recorded imagery, and post-recording, by matching  
1127 movements of individuals in the thermal imagery to the GPS tracks of collared individuals.

1128 Following initial data collection, we used the commercial software Loopy (Loopbio GmbH,  
1129 Austria) to score the behavior of identified individuals in the thermal imagery. Individuals' behavior  
1130 was scored as "wakefulness", "resting wakefulness", or "sleep". Wakefulness refers to any behavior  
1131 involving active movement (i.e. walking, running) or engaged activity (i.e. allogrooming), whereas  
1132 resting wakefulness refers to behaviors that are dormant (i.e. sitting), but not in the typical sleeping  
1133 posture of a baboon (sitting or lying with neck relaxed and head hung). Sustained dormant behavior in  
1134 the typical sleep posture was considered sleep. Video scoring resulted in a total of 8.0 hours of  
1135 behavioral observation across a total of 16 individual baboons.

1136 Synchronizing the thermal imagery data with the accelerometry data produced a validation  
1137 dataset of 294 minute-epochs across six baboons that were both classified as either sleep or wakeful  
1138 behavior from accelerometry, and scored as wakefulness, resting wakefulness, or sleep from direct  
1139 observation. With both wakefulness and resting wakefulness representing wakeful behavior, the  
1140 accelerometer-based sleep classification exhibited an accuracy of 79.9% (Table S12). Consistent with  
1141 previous validation studies of the use of accelerometry in measuring sleep (Ancoli-Israel et al., 2003;  
1142 de Souza et al., 2003), we found that accelerometer-based sleep classification has difficulty  
1143 distinguishing resting wakefulness from sleep, and we consider this limitation in our interpretation of  
1144 the results.

1145  
1146

|                                                 |        | <b>Behavioral scoring</b> |                     |        |
|-------------------------------------------------|--------|---------------------------|---------------------|--------|
|                                                 |        | Awake                     |                     | Asleep |
|                                                 |        | Wakefulness               | Resting wakefulness | Sleep  |
| <b>Accelerometer-based sleep classification</b> | Awake  | 30                        | 85                  | 19     |
|                                                 | Asleep | 0                         | 40                  | 120    |

1147 **Table S12.** Confusion matrix reporting the results of the validation study. Table entries represent the  
1148 number of minute-epochs classified according to the accelerometer-based technique and direct  
1149 behavioral observation.

1 **Supplemental Information**

2

| Collar # | GPS start date | GPS end date | ACC start date | ACC end date |
|----------|----------------|--------------|----------------|--------------|
| 2426     | 2012-08-01     | 2012-08-30   | 2012-08-01     | 2012-08-31   |
| 2427     | 2012-08-01     | 2012-09-04   | 2012-08-01     | 2012-09-04   |
| 2428     | 2012-08-01     | 2012-08-15   | 2012-08-01     | 2012-08-15   |
| 2430     | 2012-08-01     | 2012-08-03   | 2012-08-01     | 2012-08-03   |
| 2432     | 2012-08-01     | 2012-08-05   | 2012-08-01     | 2012-08-05   |
| 2433     | 2012-08-01     | 2012-08-06   | 2012-08-01     | 2012-08-06   |
| 2434     | 2012-08-01     | 2012-08-02   | 2012-08-01     | 2012-08-02   |
| 2436     | 2012-08-01     | 2012-09-02   | 2012-08-01     | 2012-09-02   |
| 2439     | 2012-08-01     | 2012-09-04   | 2012-08-01     | 2012-09-04   |
| 2441     | 2012-08-01     | 2012-08-29   | 2012-08-01     | 2012-08-29   |
| 2443     | 2012-08-01     | 2012-09-02   | 2012-08-01     | 2012-09-02   |
| 2446     | 2012-08-01     | 2012-09-02   | 2012-08-01     | 2012-09-02   |
| 2447     | 2012-08-01     | 2012-08-31   | 2012-08-01     | 2012-08-31   |
| 2448     | 2012-08-01     | 2012-08-16   | 2012-08-01     | 2012-08-17   |
| 2449     | 2012-08-01     | 2012-08-31   | 2012-08-01     | 2012-08-31   |
| 2450     | 2012-08-01     | 2012-08-05   | 2012-08-01     | 2012-08-05   |
| 2451     | 2012-08-01     | 2012-09-02   | 2012-08-01     | 2012-09-02   |
| 2452     | 2012-08-01     | 2012-08-14   | 2012-08-01     | 2012-08-14   |
| 2453     | 2012-08-01     | 2012-08-03   | 2012-08-01     | 2012-08-03   |
| 2454     | 2012-08-01     | 2012-08-14   | 2012-08-01     | 2012-08-14   |
| 2455     | 2012-08-01     | 2012-08-08   | 2012-08-01     | 2012-08-08   |
| 2456     | 2012-08-01     | 2012-08-31   | 2012-08-01     | 2012-08-31   |
| 2457     | 2012-08-01     | 2012-09-04   | 2012-08-01     | 2012-09-04   |
| 2458     | 2012-08-01     | 2012-08-01   | 2012-08-01     | 2012-08-01   |
| 2459     | 2012-08-01     | 2012-08-01   | 2012-08-01     | 2012-08-01   |
| 2460     | 2012-08-01     | 2012-08-01   | 2012-08-01     | 2012-08-01   |

3 **Table S1.** Collar metadata. Table depicts the data on which each collar began collecting data and  
 4 ceased to collected data for both GPS and accelerometry (ACC).

5

|                       | Total sleep time | Sleep onset time | Waking time | Sleep period duration | Sleep efficiency |
|-----------------------|------------------|------------------|-------------|-----------------------|------------------|
| Total sleep time      | 1                | -0.61            | 0.65        | 0.87                  | 0.57             |
| Sleep onset time      | x                | 1                | -0.04       | -0.72                 | -0.05            |
| Waking time           | x                | x                | 1           | 0.72                  | 0.10             |
| Sleep period duration | x                | x                | x           | 1                     | 0.11             |
| Sleep efficiency      | x                | x                | x           | x                     | 1                |

6 **Table S2.** Pearson correlation coefficient between the metrics of sleep extracted from the  
 7 accelerometry data. Total sleep time is correlated with all sleep metrics.

8

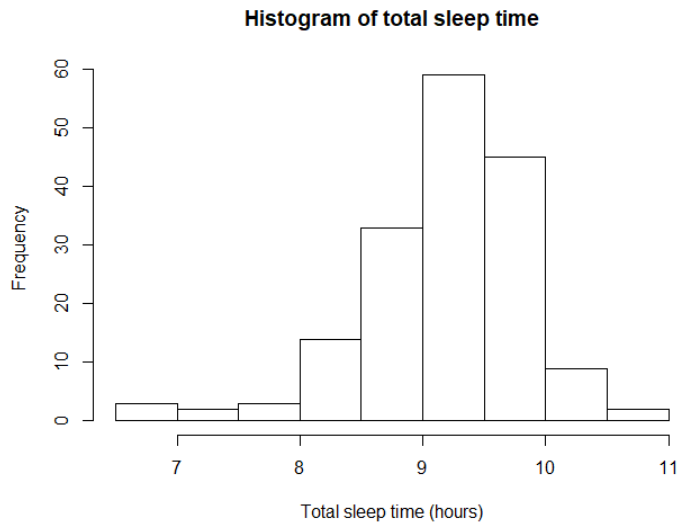

9  
10  
11  
12

**Figure S1.** Histogram of total sleep time for the first 20 nights of the study (data prior to leopard attack)

| <b>Total sleep time (Standardized)</b>                    |                  |                 |
|-----------------------------------------------------------|------------------|-----------------|
| <i>Predictors</i>                                         | <i>Estimates</i> | <i>CI (95%)</i> |
| <b>Intercept</b>                                          | -0.03            | -0.55 – 0.49    |
| <b>Travel distance</b>                                    | -0.02            | -0.18 – 0.15    |
| <b>Time spent napping</b>                                 | -0.18            | -0.36 – -0.01   |
| <b>Previous night total sleep time</b>                    | -0.00            | -0.14 – 0.13    |
| <b>Tree fidelity score</b>                                | 0.20             | 0.05 – 0.36     |
| <b>Relative number of baboons in tree</b>                 | -0.51            | -0.85 – -0.16   |
| <b>Minimum ambient temperature</b>                        | -0.03            | -0.21 – 0.13    |
| <b>Moon phase</b>                                         | 0.05             | -0.12 – 0.22    |
| <b>age: Juvenile</b>                                      | -0.32            | -1.12 – 0.50    |
| <b>age: Subadult</b>                                      | -0.32            | -0.80 – 0.14    |
| <b>sex: Male</b>                                          | 0.44             | -0.04 – 0.92    |
| <b>tree: tree2</b>                                        | -0.26            | -1.08 – 0.56    |
| <b>tree: tree3</b>                                        | -0.15            | -1.01 – 0.69    |
| <b>tree: tree4</b>                                        | -0.81            | -1.30 – -0.32   |
| <b>tree: tree5</b>                                        | -0.24            | -0.74 – 0.27    |
| <b>tree: tree6</b>                                        | 0.02             | -0.60 – 0.65    |
| <b>tree: tree7</b>                                        | 0.10             | -0.62 – 0.84    |
| <b>tree: tree8</b>                                        | -0.26            | -0.75 – 0.22    |
| <b>tree: tree10</b>                                       | -0.22            | -0.95 – 0.51    |
| <b>tree: tree11</b>                                       | -0.22            | -0.78 – 0.32    |
| <b>Random Effects</b>                                     |                  |                 |
| $\sigma^2$                                                | 0.53             |                 |
| $\tau_{00 \text{ night}}$                                 | 0.02             |                 |
| $\tau_{00 \text{ tag}}$                                   | 0.08             |                 |
| <b>ICC</b>                                                | 0.16             |                 |
| $N_{\text{tag}}$                                          | 18               |                 |
| $N_{\text{night}}$                                        | 18               |                 |
| <b>Observations</b>                                       | 170              |                 |
| <b>Marginal R<sup>2</sup> / Conditional R<sup>2</sup></b> | 0.340 / 0.414    |                 |

13 **Table S3.** Model output table of model total sleep time (for the first 20 days) with all numerical  
 14 variables standardized

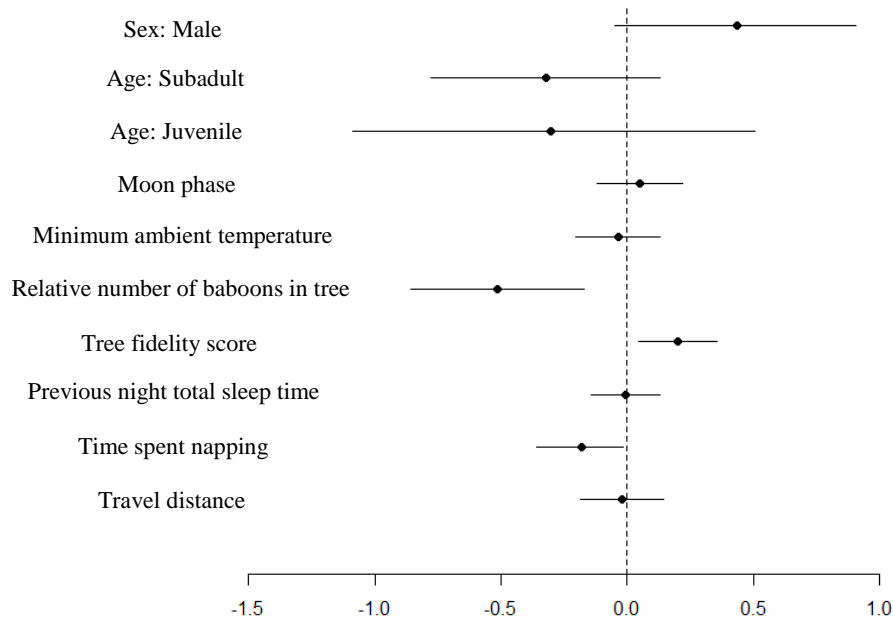

15 **Figure S2.** Model output plot of model of total sleep time (for the first 20 days) with all numerical  
 16 variables standardized. The categorical variable tree is not plotted  
 17  
 18

| <i>Predictors</i>                                      | <b>Total sleep time (hours)</b> |                 |
|--------------------------------------------------------|---------------------------------|-----------------|
|                                                        | <i>Estimates</i>                | <i>CI (95%)</i> |
| <b>Intercept</b>                                       | 18.65                           | -24.20 – 63.97  |
| <b>Travel distance (km)</b>                            | -0.01                           | -0.12 – 0.09    |
| <b>Time spent napping (mins)</b>                       | -0.01                           | -0.01 – -0.00   |
| <b>Previous night relative total sleep time (mins)</b> | -0.00                           | -0.00 – 0.00    |
| <b>Tree fidelity score</b>                             | 0.60                            | 0.15 – 1.03     |
| <b>Relative number of baboons in tree</b>              | -1.55                           | -2.58 – -0.48   |
| <b>Minimum ambient temperature (degree Celsius)</b>    | -0.03                           | -0.19 – 0.12    |
| <b>Moon phase</b>                                      | 0.11                            | -0.25 – 0.48    |
| <b>age: Juvenile</b>                                   | -0.26                           | -0.85 – 0.38    |
| <b>age: Subadult</b>                                   | -0.25                           | -0.60 – 0.10    |
| <b>sex: Male</b>                                       | 0.34                            | -0.03 – 0.72    |
| <b>tree: tree2</b>                                     | -0.20                           | -0.84 – 0.44    |
| <b>tree: tree3</b>                                     | -0.12                           | -0.79 – 0.55    |
| <b>tree: tree4</b>                                     | -0.64                           | -1.03 – -0.25   |
| <b>tree: tree5</b>                                     | -0.20                           | -0.59 – 0.19    |
| <b>tree: tree6</b>                                     | 0.02                            | -0.48 – 0.50    |
| <b>tree: tree7</b>                                     | 0.09                            | -0.46 – 0.64    |
| <b>tree: tree8</b>                                     | -0.22                           | -0.59 – 0.16    |
| <b>tree: tree10</b>                                    | -0.17                           | -0.74 – 0.38    |
| <b>tree: tree11</b>                                    | -0.18                           | -0.60 – 0.24    |
| <b>Random Effects</b>                                  |                                 |                 |

|                                    |               |
|------------------------------------|---------------|
| $\sigma^2$                         | 0.31          |
| $\tau_{00 \text{ night}}$          | 0.01          |
| $\tau_{00 \text{ tag}}$            | 0.05          |
| ICC                                | 0.17          |
| $N_{\text{tag}}$                   | 18            |
| $N_{\text{night}}$                 | 18            |
| Observations                       | 170           |
| Marginal $R^2$ / Conditional $R^2$ | 0.337 / 0.412 |

19 **Table S4.** Model output table of model total sleep time (for the first 20 days) with no standardization  
20 of variables  
21

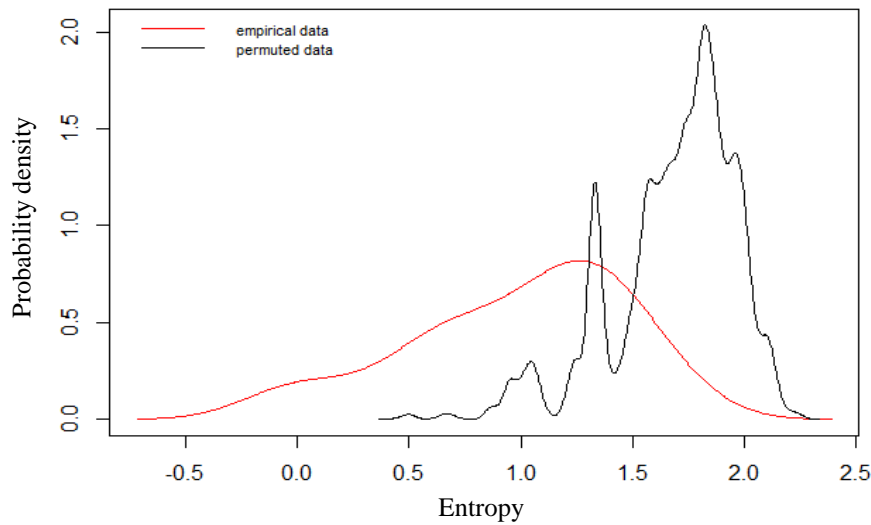

22 **Figure S3.** Comparison of the Shannon entropies of individuals' sleep tree occupancy within this  
23 sleep site to a null distribution produced by 1000 identity permutations. The analysis revealed lower  
24 entropy in tree occupancy than expected by random chance (one-tailed two-sample Kolmogorov-  
25 Smirnov test:  $p < 1.0 \times 10^{-9}$ ), indicating that individuals exhibited high fidelity to particular trees. The  
26 red line represents the distribution of Shannon entropies of individuals' sleep tree occupancy  
27 calculated from the empirical data, and the black line represents the distribution of entropy of sleep  
28 tree occupancy derived from the permuted data set.  
29  
30  
31  
32

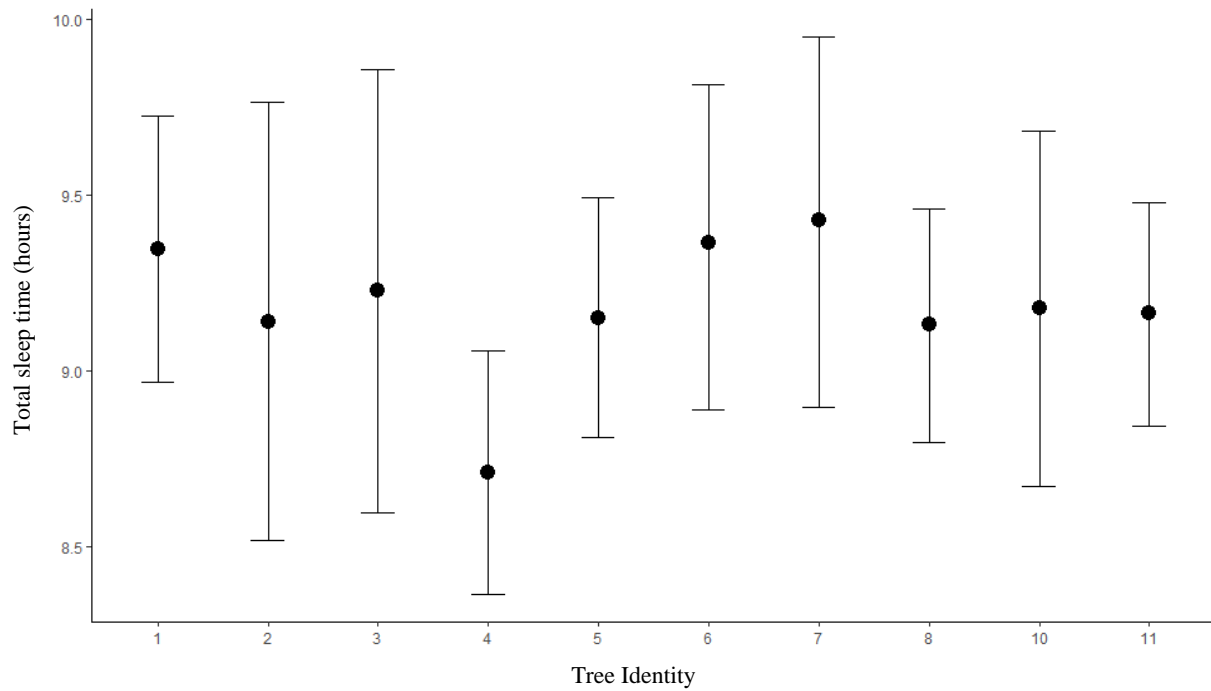

33  
34  
35  
36  
37

**Figure S4.** The conditional effect of tree identity on total sleep time. The conditional effects plotted here are from the unstandardized Bayesian linear mixed model (LMM) of total sleep time (hours).

| Total sleep time (Standardized)    |           |               |
|------------------------------------|-----------|---------------|
| Predictors                         | Estimates | CI (95%)      |
| Intercept                          | -0.04     | -0.55 – 0.47  |
| Average VeDBA during day           | -0.12     | -0.33 – 0.12  |
| Time spent napping                 | -0.13     | -0.30 – 0.05  |
| Previous night total sleep time    | -0.00     | -0.14 – 0.13  |
| Tree fidelity score                | 0.20      | 0.04 – 0.36   |
| Relative number of baboons in tree | -0.55     | -0.89 – -0.20 |
| Minimum ambient temperature        | -0.04     | -0.21 – 0.12  |
| Moon phase                         | 0.07      | -0.09 – 0.23  |
| age: Juvenile                      | -0.21     | -1.01 – 0.59  |
| age: Subadult                      | -0.26     | -0.77 – 0.22  |
| sex: Male                          | 0.53      | 0.09 – 0.97   |
| tree: tree2                        | -0.34     | -1.18 – 0.49  |
| tree: tree3                        | -0.47     | -1.26 – 0.33  |
| tree: tree4                        | -0.86     | -1.37 – -0.35 |
| tree: tree5                        | -0.28     | -0.79 – 0.22  |
| tree: tree6                        | 0.04      | -0.60 – 0.68  |
| tree: tree7                        | 0.08      | -0.66 – 0.83  |
| tree: tree8                        | -0.28     | -0.77 – 0.23  |
| tree: tree10                       | -0.13     | -0.84 – 0.58  |
| tree: tree11                       | -0.24     | -0.79 – 0.31  |
| Random Effects                     |           |               |
| $\sigma^2$                         | 0.55      |               |
| $\tau_{00}$ night                  | 0.02      |               |
| $\tau_{00}$ tag                    | 0.07      |               |
| ICC                                | 0.13      |               |



|                                                           |               |
|-----------------------------------------------------------|---------------|
| <b>N<sub>tag</sub></b>                                    | 18            |
| <b>N<sub>night</sub></b>                                  | 18            |
| <b>Observations</b>                                       | 178           |
| <b>Marginal R<sup>2</sup> / Conditional R<sup>2</sup></b> | 0.352 / 0.416 |

38 **Table S5.** Model output table of model total sleep time (for the first 20 days) with all numerical  
 39 variables standardized  
 40

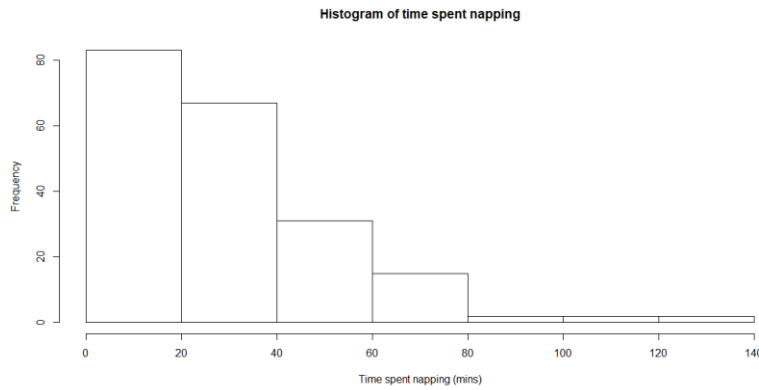

41 **Figure S5.** Histogram of time spent napping for the first 20 days of the study (data prior to leopard  
 42 attack)  
 43  
 44

| <b>Time spent napping (standardized)</b>                  |                  |                 |
|-----------------------------------------------------------|------------------|-----------------|
| <i>Predictors</i>                                         | <i>Estimates</i> | <i>CI (95%)</i> |
| <b>Intercept</b>                                          | -0.10            | -0.49 – 0.28    |
| <b>Prior night total sleep time</b>                       | 0.05             | -0.08 – 0.18    |
| <b>Random Effects</b>                                     |                  |                 |
| <b>σ<sup>2</sup></b>                                      | 0.41             |                 |
| <b>τ<sub>00</sub> night</b>                               | 0.12             |                 |
| <b>τ<sub>00</sub> tag</b>                                 | 0.51             |                 |
| <b>ICC</b>                                                | 0.60             |                 |
| <b>N<sub>tag</sub></b>                                    | 20               |                 |
| <b>N<sub>night</sub></b>                                  | 19               |                 |
| <b>Observations</b>                                       | 199              |                 |
| <b>Marginal R<sup>2</sup> / Conditional R<sup>2</sup></b> | 0.003 / 0.617    |                 |

45 **Table S6.** Model output table of model of time spent napping during the day (for the first 20 days)  
 46 with all numerical variables standardized  
 47

| <b>Time spent napping (minutes)</b>         |                  |                 |
|---------------------------------------------|------------------|-----------------|
| <i>Predictors</i>                           | <i>Estimates</i> | <i>CI (95%)</i> |
| <b>Intercept</b>                            | 21.22            | -5.83 – 47.59   |
| <b>Prior night total sleep time (hours)</b> | 1.53             | -1.23 – 4.42    |
| <b>Random Effects</b>                       |                  |                 |
| <b>σ<sup>2</sup></b>                        | 295.93           |                 |
| <b>τ<sub>00</sub> night</b>                 | 25.86            |                 |
| <b>τ<sub>00</sub> tag</b>                   | 99.07            |                 |
| <b>ICC</b>                                  | 0.30             |                 |
| <b>N<sub>tag</sub></b>                      | 20               |                 |
| <b>N<sub>night</sub></b>                    | 19               |                 |
| <b>Observations</b>                         | 199              |                 |

|                                                           |               |
|-----------------------------------------------------------|---------------|
| <b>Marginal R<sup>2</sup> / Conditional R<sup>2</sup></b> | 0.002 / 0.521 |
|-----------------------------------------------------------|---------------|

48 **Table S7.** Model output table of model of time spent napping during the day (for the first 20 days)  
 49 without standardization of the variables  
 50

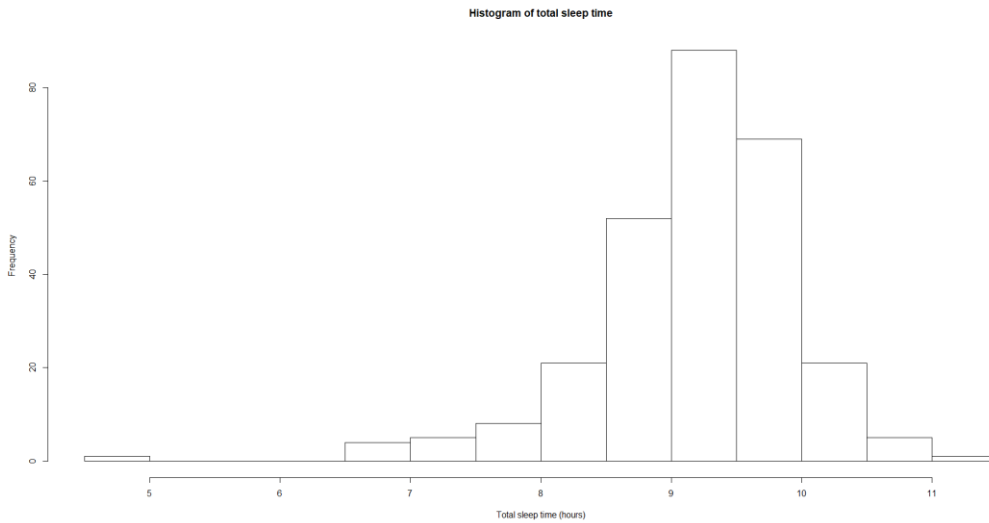

51 **Figure S6.** Histogram of total sleep time for the entire study duration  
 52  
 53  
 54

| <b>Total sleep time (standardized)</b>                          |                  |                 |
|-----------------------------------------------------------------|------------------|-----------------|
| <i>Predictors</i>                                               | <i>Estimates</i> | <i>CI (95%)</i> |
| <b>Intercept</b>                                                | -0.24            | -0.57 – 0.11    |
| <b>cond_night: night of leopard attack</b>                      | -0.25            | -0.87 – 0.39    |
| <b>cond_night: first night in new sleep site</b>                | -1.55            | -2.18 – -0.91   |
| <b>cond_night: second night in new sleep site</b>               | -0.26            | -0.98 – 0.44    |
| <b>cond_night: third night in new sleep site</b>                | 0.21             | -0.47 – 0.88    |
| <b>cond_night: remainder of nights (in original sleep site)</b> | 0.25             | -0.07 – 0.56    |
| <b>age: Juvenile</b>                                            | -0.27            | -1.14 – 0.59    |
| <b>age: Subadult</b>                                            | -0.36            | -0.87 – 0.13    |
| <b>sex: Male</b>                                                | 0.74             | 0.25 – 1.26     |
| <b>Travel distance</b>                                          | -0.06            | -0.18 – 0.07    |
| <b>Time spent napping</b>                                       | -0.11            | -0.28 – 0.05    |
| <b>Previous night relative total sleep time</b>                 | 0.15             | 0.04 – 0.27     |
| <b>Minimum ambient temperature</b>                              | -0.00            | -0.14 – 0.14    |
| <b>Moon phase</b>                                               | 0.02             | -0.12 – 0.15    |
| <b>Random Effects</b>                                           |                  |                 |
| <b>σ<sup>2</sup></b>                                            | 0.78             |                 |
| <b>τ<sub>00</sub> tag</b>                                       | 0.14             |                 |
| <b>ICC</b>                                                      | 0.16             |                 |
| <b>N<sub>tag</sub></b>                                          | 20               |                 |
| <b>Observations</b>                                             | 275              |                 |
| <b>Marginal R<sup>2</sup> / Conditional R<sup>2</sup></b>       | 0.251 / 0.314    |                 |

55 **Table S8.** Model output table of model of total sleep time using data from entire study duration  
 56 (including after the leopard attack) with all variables standardized  
 57

| <b>Total sleep time (hours)</b> |                  |                 |
|---------------------------------|------------------|-----------------|
| <i>Predictors</i>               | <i>Estimates</i> | <i>CI (95%)</i> |

|                                                                 |               |                |
|-----------------------------------------------------------------|---------------|----------------|
| <b>Intercept</b>                                                | 8.43          | -43.81 – 59.58 |
| <b>cond_night: night of leopard attack</b>                      | -0.21         | -0.90 – 0.48   |
| <b>cond_night: first night in new sleep site</b>                | -1.19         | -1.88 – -0.49  |
| <b>cond_night: second night in new sleep site</b>               | -0.23         | -0.98 – 0.48   |
| <b>cond_night: third night in new sleep site</b>                | 0.15          | -0.58 – 0.86   |
| <b>cond_night: remainder of nights (in original sleep site)</b> | 0.15          | -0.19 – 0.48   |
| <b>age: Juvenile</b>                                            | -0.28         | -0.96 – 0.39   |
| <b>age: Subadult</b>                                            | -0.31         | -0.71 – 0.07   |
| <b>sex: Male</b>                                                | 0.58          | 0.19 – 0.99    |
| <b>Travel distance</b>                                          | -0.04         | -0.13 – 0.05   |
| <b>Time spent napping</b>                                       | -0.00         | -0.01 – 0.00   |
| <b>Previous night relative total sleep time</b>                 | 0.00          | 0.00 – 0.00    |
| <b>Minimum ambient temperature</b>                              | 0.00          | -0.17 – 0.19   |
| <b>Moon phase</b>                                               | 0.07          | -0.33 – 0.47   |
| <b>Random Effects</b>                                           |               |                |
| $\sigma^2$                                                      | 0.43          |                |
| $\tau_{00}$ night                                               | 0.05          |                |
| $\tau_{00}$ tag                                                 | 0.09          |                |
| <b>ICC</b>                                                      | 0.25          |                |
| $N_{tag}$                                                       | 20            |                |
| $N_{night}$                                                     | 32            |                |
| <b>Observations</b>                                             | 275           |                |
| <b>Marginal <math>R^2</math> / Conditional <math>R^2</math></b> | 0.257 / 0.365 |                |

58 **Table S9.** Model output table of model of total sleep time using data from entire study duration  
 59 (including after the leopard attack) without standardization of variables  
 60

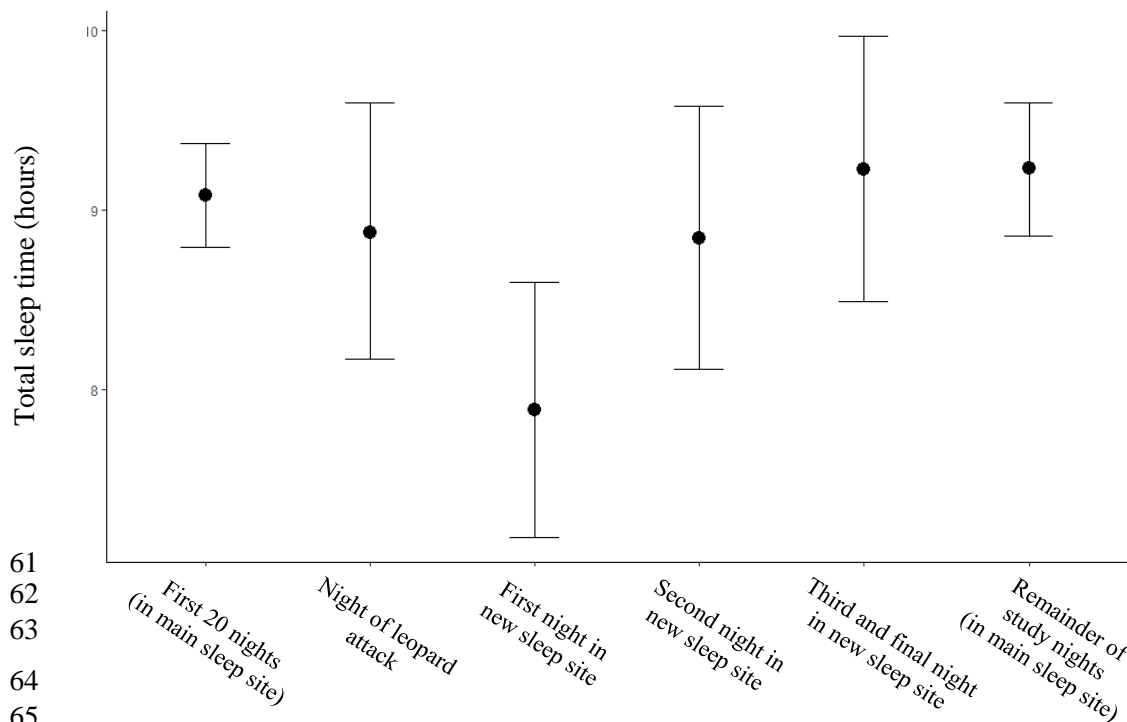

61  
 62 **Figure S7.** The conditional effect of night condition on total sleep time. The conditional effects  
 63 presented here are from the unstandardized model of total sleep time.  
 64  
 65  
 66  
 67  
 68

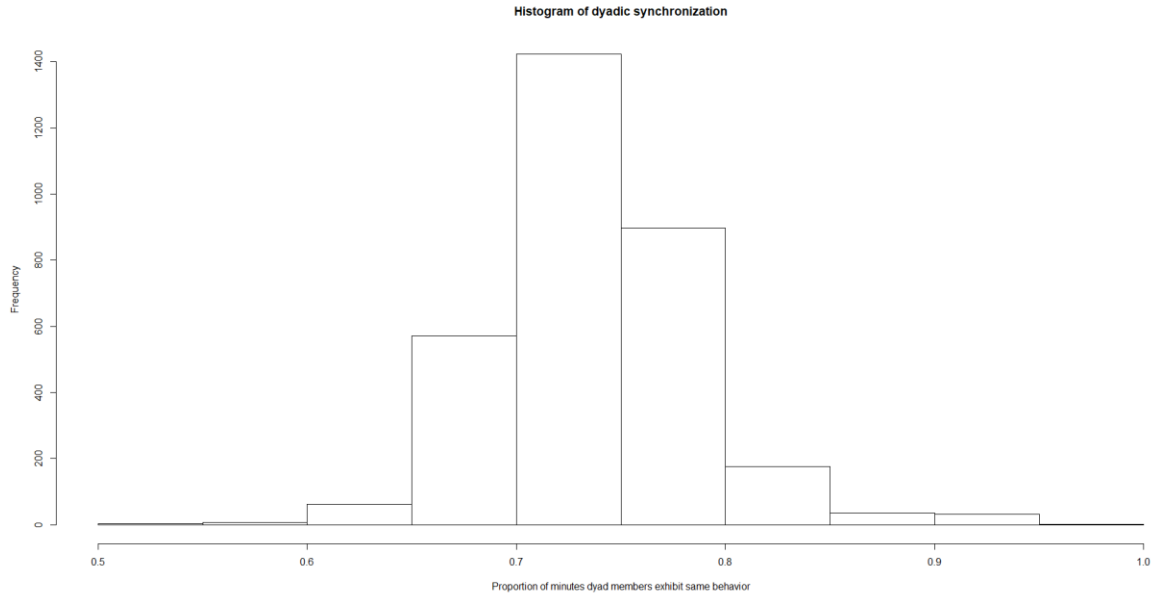

69  
70  
71  
72  
73

**Figure S8.** Histogram of the dyadic synchronization scores, which indicates the proportions of minutes between 21:00 and 05:00 during which both members of a dyad exhibited the same behavior (either sleep or wakefulness) on a given night.

| Proportion of minutes synchronized (Standardized)         |                  |                 |
|-----------------------------------------------------------|------------------|-----------------|
| <i>Predictors</i>                                         | <i>Estimates</i> | <i>CI (95%)</i> |
| <b>Intercept</b>                                          | -0.21            | -0.45 – 0.03    |
| <b>Occupying same tree</b>                                | 0.56             | 0.47 – 0.64     |
| <b>Random Effects</b>                                     |                  |                 |
| $\sigma^2$                                                | 0.60             |                 |
| $\tau_{00}$ dy_name                                       | 0.14             |                 |
| $\tau_{00}$ night                                         | 0.19             |                 |
| $\tau_{00}$ tag1                                          | 0.08             |                 |
| $\tau_{00}$ tag2                                          | 0.09             |                 |
| <b>ICC</b>                                                | 0.45             |                 |
| <b>N</b> night                                            | 34               |                 |
| <b>N</b> tag1                                             | 22               |                 |
| <b>N</b> tag2                                             | 22               |                 |
| <b>N</b> dy_name                                          | 250              |                 |
| <b>Observations</b>                                       | 2997             |                 |
| <b>Marginal R<sup>2</sup> / Conditional R<sup>2</sup></b> | 0.050 / 0.404    |                 |

74  
75  
76  
77

**Table S10.** Model output table of model of synchronization (i.e. the proportion of minutes during a night that both dyad members exhibit the same behavior, either sleep or wakefulness) with response variable standardized of the response variable

| Proportion of minutes synchronized |                  |                 |
|------------------------------------|------------------|-----------------|
| <i>Predictors</i>                  | <i>Estimates</i> | <i>CI (95%)</i> |
| <b>Intercept</b>                   | 0.73             | 0.71 – 0.74     |
| <b>Occupying same tree</b>         | 0.03             | 0.02 – 0.03     |
| <b>Random Effects</b>              |                  |                 |
| $\sigma^2$                         | 0.00             |                 |
| $\tau_{00}$ dy_name                | 0.00             |                 |
| $\tau_{00}$ night                  | 0.00             |                 |

|                                    |               |
|------------------------------------|---------------|
| $T_{00}$ tag1                      | 0.00          |
| $T_{00}$ tag2                      | 0.00          |
| ICC                                | 0.45          |
| $N_{\text{night}}$                 | 34            |
| $N_{\text{tag1}}$                  | 22            |
| $N_{\text{tag2}}$                  | 22            |
| $N_{\text{dy\_name}}$              | 250           |
| Observations                       | 2997          |
| Marginal $R^2$ / Conditional $R^2$ | 0.050 / 0.404 |

78 **Table S11.** Model output table of model of synchronization (i.e. the proportion of minutes during a  
 79 night that both dyad members exhibit the same behavior, either sleep or wakefulness) without  
 80 standardization of the response variable  
 81



82  
 83 **Figure S9.** A toy example of the procedure we used to test for sentinel behavior and synchronization  
 84 of nighttime behavior. Each row represents a baboon's time-series of sleep and wake activity during  
 85 the night, with black vertical lines indicating periods of nocturnal waking behavior. Colors correspond  
 86 to different nights, and the transparency of the color indicates the timing of night, with reference to  
 87 the empirical, unshifted data. The time shifting procedure was repeated 1000 times to generate a null  
 88 distribution for the proportion of minutes in which at least one individual is awake during the night  
 89 and the mean proportion of the group exhibiting synchronized behavior.

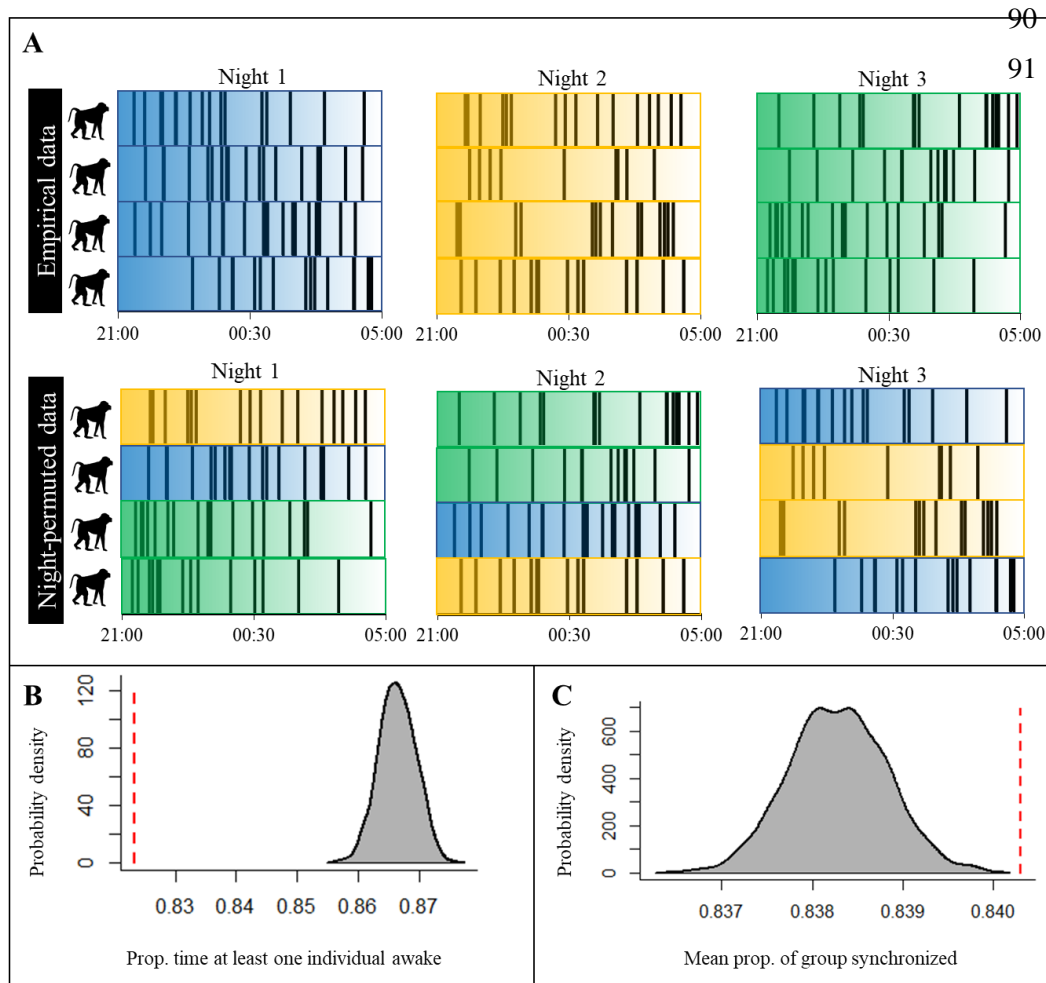

92 **Figure S10.** A) A toy example of the procedure alternative to the one presented in the main text (and  
 93 represented in Figure S9) that we used to confirm findings concerning sentinel behavior and  
 94 synchronization of nighttime behavior that we derived from the procedure presented in the main text.  
 95 Each row represents a baboon's time-series of sleep and wake activity during the night, with black  
 96 vertical lines indicating periods of nocturnal waking behavior. Colors correspond to different nights,  
 97 with reference to the empirical, unpermuted data, and the transparency of the color indicates the  
 98 timing of night. The night permutation procedure was repeated 1000 times to generate a null  
 99 distribution for the proportion of minutes in which at least one individual is awake during the night  
 100 and the mean proportion of the group exhibiting synchronized behavior. B) Comparison of the  
 101 empirical proportion of minutes in which at least one individual is awake (red dotted line) to its null  
 102 distribution (grey density plot;  $p < 0.0001$ ). C) Comparison of the empirical mean of the proportion of  
 103 the group exhibiting synchronized behavior (red dotted line) to its null distribution (grey density plot;  
 104  $p < 0.0001$ ). This method of permutation controls for the possibility that baboons are synchronized in  
 105 their behavior simply as a result of species-typical nocturnal waking patterns that are consistent across  
 106 baboons and across nights.

107  
 108 *Sleep validation study*

109  
 110 To evaluate whether the accelerometer-based sleep classification technique was accurately  
 111 monitoring sleep in baboons, we returned to Mpala Research Centre in July 2019 to perform a  
 112 validation study in which we compared the results of the accelerometer-based sleep classification to  
 113 direct observations of awake and sleeping baboons. Using the procedures described in Strandburg-  
 114 Peshkin et al., 2015, we trapped and anesthetized 27 members of a group of habituated olive baboons,  
 115 fitting each with a GPS and accelerometry collar. Eleven of the 27 collars deployed recorded  
 116 continuous tri-axial accelerations at 12 Hz/axis from 06:30 to 18:00 and 0.71-second bursts of

117 accelerations at 56.2 Hz/axis at the beginning of every minute from 18:00 to 06:30. Accelerometry  
118 data was collected by each of these 11 collars for up to 31 days. The remaining 16 collars did not  
119 collect accelerometry data from 06:30 to 18:00, and thus we excluded data from these collars from the  
120 validation study.

121 We down-sampled and interpolated the accelerometry data such that it matched the sampling  
122 frequency and schedule of the data collected in 2012 (i.e. the data analyzed for this manuscript). We  
123 then applied the sleep classification algorithm described in the Materials and Methods to this  
124 validation dataset.

125 To validate the sleep classification algorithm, we performed direct behavioral observations of  
126 the baboons at their primary sleep site. We recorded the behavior of the study baboons starting when  
127 they approached their sleep site using a FLIR T1020 high-resolution infrared camera (FLIR Systems  
128 Inc., Wilsonville, OR, USA). Recordings continued into the night for as long as the camera battery  
129 allowed (average recording duration (range of recording durations): 7.4 hours (1.7 – 14.9 hours)), and  
130 we collected thermal imaging data on 21 nights. We identified individuals in the thermal imagery both  
131 in real-time, via observer narration of the recorded imagery, and post-recording, by matching  
132 movements of individuals in the thermal imagery to the GPS tracks of collared individuals.

133 Following initial data collection, we used the commercial software Loopy (Loopbio GmbH,  
134 Austria) to score the behavior of identified individuals in the thermal imagery. Individuals' behavior  
135 was scored as "wakefulness", "resting wakefulness", or "sleep". Wakefulness refers to any behavior  
136 involving active movement (i.e. walking, running) or engaged activity (i.e. allogrooming), whereas  
137 resting wakefulness refers to behaviors that are dormant (i.e. sitting), but not in the typical sleeping  
138 posture of a baboon (sitting or lying with neck relaxed and head hung). Sustained dormant behavior in  
139 the typical sleep posture was considered sleep. Video scoring resulted in a total of 8.0 hours of  
140 behavioral observation across a total of 16 individual baboons.

141 Synchronizing the thermal imagery data with the accelerometry data produced a validation  
142 dataset of 294 minute-epochs across six baboons that were both classified as either sleep or wakeful  
143 behavior from accelerometry, and scored as wakefulness, resting wakefulness, or sleep from direct  
144 observation. With both wakefulness and resting wakefulness representing wakeful behavior, the  
145 accelerometer-based sleep classification exhibited an accuracy of 79.9% (Table S12). Consistent with  
146 previous validation studies of the use of accelerometry in measuring sleep (Ancoli-Israel et al., 2003;  
147 de Souza et al., 2003), we found that accelerometer-based sleep classification has difficulty  
148 distinguishing resting wakefulness from sleep, and we consider this limitation in our interpretation of  
149 the results.

150  
151

|                                          |        | Behavioral scoring |                     |        |
|------------------------------------------|--------|--------------------|---------------------|--------|
|                                          |        | Awake              |                     | Asleep |
|                                          |        | Wakefulness        | Resting wakefulness | Sleep  |
| Accelerometer-based sleep classification | Awake  | 30                 | 85                  | 19     |
|                                          | Asleep | 0                  | 40                  | 120    |

152 **Table S12.** Confusion matrix reporting the results of the validation study. Table entries represent the  
153 number of minute-epochs classified according to the accelerometer-based technique and direct  
154 behavioral observation.
